# Supplementary material for: Room temperature cupric halides mediated olefin alkoxylation of BODIPYs with methanol: mechanisms and scope
Source: Royal Society of Chemistry journal article supplement (doi:10.1039/c9ob02590a), 2020-01-01
Supplement: c9ob02590a1.pdf [file c9ob02590a1.pdf]

## Supplementary Information

### Room temperature cupric halide mediated olefin alkoxylation of BODIPYs with methanol: mechanisms and scope

Ying Yang,<sup>a</sup> Xiangrong Wei,<sup>a</sup> Yuexing Zhang,<sup>d</sup> Xin Chi,<sup>d</sup> Dejian Huang,<sup>c</sup> Fu wang,<sup>b</sup> Haixia Wu<sup>\*a,c</sup> and  
Jialin Ming<sup>\*a</sup>

<sup>a</sup>Department of Chemistry, College of Chemistry and Chemical Engineering, Inner Mongolia University,  
Hohhot, China 010021.

<sup>b</sup> School of Environmental Science and Engineering, Shanghai Jiao Tong University, Shanghai, China 200240.

<sup>c</sup> Department of Food Science and Technology, National University of Singapore, 3 Science Drive 3,  
Singapore 117543.

<sup>d</sup>Ministry of Education Key Laboratory for the Synthesis and Application of Organic Functional Molecules.  
College of Chemistry and Chemical Engineering, Hubei University, Wuhan, China 430062.

Corresponding author:

E-mail: chmwuhx@imu.edu.cn

E-mail: mingjialin@imu.edu.cn

## Experimental Section

**Materials and Methods.** Otherwise stated, all chemicals and solvents were purchased from commercial suppliers and used without further purification. Anhydrous acetonitrile was distilled from  $\text{CaH}_2$  prior to use. Fluorescence emission spectra were carried out on HORIBA Scientific Fluorolog<sup>®</sup>-3 spectrofluorometer. UV-Vis spectra were obtained on Shimadzu UV-1601 UV-visible spectrophotometer fitted with a quartz cell.  $^1\text{H}$  NMR and  $^{13}\text{C}\{^1\text{H}\}$  NMR spectra were recorded on a Bruker AC300 spectrometer (Karlsruhe, Germany) at 300 MHz or 500 MHz, using  $\text{CDCl}_3$  as solvents. High resolution mass spectra were obtained from the microTOF-Q II 1026 mass spectrometer with an ESI source. Electron spin resonance (ESR) spectra were recorded on a JES-FA200 ESR spectrometer at room temperature. Cyclic voltammetry (CV) was performed in anhydrous and degassed acetonitrile on a CHI 620C electrochemical analyzer with a three-electrode cell, containing 0.1M tetra-n-butylammonium hexafluorophosphate (TBAP) as supporting electrolyte at a scan rate of 0.05 V/s at room temperature. Ag/AgCl (0.01 M  $\text{AgNO}_3$  in acetonitrile), a gold disk and a Pt wire were used as reference electrode, working electrode and counter electrode, respectively. The oxidation potential was externally calibrated against the ferrocene/ferrocenium ( $\text{Fc}/\text{Fc}^+$ ) redox couple [ $E_{1/2}(\text{Fc}/\text{Fc}^+) = 0.40$  V vs. SCE in acetonitrile].<sup>1</sup>

**DFT Calculations.** The ground state molecular structures were optimized in dichloromethane solvent using the integral equation formalism variant (IEF) of PCM with the B3LYP hybrid exchange-correlation (XC) functional along with the SDD basis set, which includes an effective core potential (ECP) for Cu and the 6-31G(d) basis set for the other atoms. No symmetry constraint was imposed during geometry optimization. At the optimized structures, harmonic vibrational frequencies (all real) were calculated to confirm that all optimized structures correspond to energy minima. All calculations were performed by using the Gaussian 16 program.<sup>2</sup> Ionization potential was calculated as the energy difference between the optimized cation and neutral molecules.

**General Alkoxylation Synthesis.** BODIPY dyes **1**, **2** and **2a** were prepared by our previously work.<sup>3</sup> All alkoxylation products were synthesized by following general method. A solution of cupric halides (1.6 mmol) dissolved in alcohols was added to the solution of substrate (0.16 mmol) in dichloromethane, and the final volume ratio of alcohols and dichloromethane would be 1:10 to achieve the final molar ratio of substrate to  $\text{Cu}^{2+}$  to 1 to10. The reaction mixture was stirred at room temperature for about 30 min or 1 hour and washed with deionized water three times. The organic solution was dried over anhydrous  $\text{Na}_2\text{SO}_4$ . The solution was then filtered and

the volatiles removed under reduced pressure to give crude product, which was further purified by chromatography on silica gel.

Spectral data for 3-[(1,2-dimethoxy)-N,N-dimethylaniline]-5-(N,N-dimethylaniline)-1,7-dimethyl-8-nitrobenzene-4,4-difluoroboradiazaindacene (**1a**): Column separation by dichloromethane and hexanes (v/v, 92:8) gave dark blue solid (19.1 mg, yield 88 %).  $^1\text{H}$  NMR (300 MHz,  $\text{CDCl}_3$ , ppm): 8.13 (d,  $J = 9$  Hz, 1H, Ar-H), 7.76-7.61 (m, 3H), 7.53 (d,  $J = 9$  Hz, 4H, Ar-H), 7.42 (d,  $J = 9$  Hz, 2H, Ar-H), 6.71 (d,  $J = 6$  Hz, 4H, Ar-H), 6.59 (s, 1H, Pyrrole-H), 6.29 (s, 1H, Pyrrole-H), 5.00 (d,  $J = 6$  Hz, 1H,  $-\text{CH}_2\text{CH}_2-$ ), 4.87 (d,  $J = 6$  Hz, 1H,  $-\text{CH}_2\text{CH}_2-$ ), 3.42 (s, 3H,  $\text{OCH}_3$ ), 3.38 (s, 3H,  $\text{OCH}_3$ ), 3.04 (s, 6H,  $\text{N}(\text{CH}_3)_2$ ), 2.90 (s, 6H,  $\text{N}(\text{CH}_3)_2$ ), 1.39 (s, 3H,  $\text{CH}_3$ ), 1.34 (s, 3H,  $\text{CH}_3$ ).  $^{13}\text{C}\{^1\text{H}\}$  NMR (125 MHz,  $\text{CDCl}_3$ , ppm): 149.0, 141.0, 134.0, 131.9, 131.3, 130.4, 129.6, 125.0, 112.3, 54.3, 40.4, 14.3. HRMS (ESI-MS) m/z:  $[\text{M}+\text{H}]^+$  Calcd for  $\text{C}_{39}\text{H}_{43}\text{BF}_2\text{N}_5\text{O}_4$  694.3379; Found 694.3392.

Spectral data for 3,5-[(1,2-dimethoxy)-N,N-dimethylaniline]-1,7-dimethyl-8-nitrobenzene-4,4-difluoroboradiazaindacene (**1b**): Column separation by dichloromethane and hexanes (v/v, 995:5) gave dark purple solid (19.4 mg, yield 80%).  $^1\text{H}$  NMR (500 MHz,  $\text{CDCl}_3$ , ppm): 7.72 (d,  $J = 10$  Hz, 1H), 7.66 (d,  $J = 5$  Hz, 1H), 7.44-7.39 (m, 6H), 6.74-6.71 (m, 4H), 6.31 (d,  $J = 5$  Hz, 1H), 6.29 (s, 1H), 5.00 (d,  $J = 5$  Hz, 2H,  $-\text{CH}_2\text{CH}_2-$ ), 4.85 (d,  $J = 5$  Hz, 1H,  $-\text{CH}_2\text{CH}_2-$ ), 4.83 (d,  $J = 5$  Hz, 1H,  $-\text{CH}_2\text{CH}_2-$ ), 3.42 (s, 3H,  $\text{OCH}_3$ ), 3.40 (s, 3H,  $\text{OCH}_3$ ), 3.38 (s, 3H,  $\text{OCH}_3$ ), 3.36 (s, 3H,  $\text{OCH}_3$ ), 2.93 (s, 6H,  $\text{N}(\text{CH}_3)_2$ ), 2.92 (s, 6H,  $\text{N}(\text{CH}_3)_2$ ), 1.32 (s, 6H,  $\text{CH}_3$ ).  $^{13}\text{C}\{^1\text{H}\}$  NMR (125 MHz,  $\text{CDCl}_3$ , ppm): 152.1, 142.9, 141.1, 135.3, 130.5, 124.2, 123.7, 121.0, 116.2, 114.4, 107.2, 55.3, 54.7, 40.5, 14.5. HRMS (ESI-MS) m/z:  $[\text{M}+\text{Na}]^+$  Calcd for  $\text{C}_{41}\text{H}_{48}\text{BF}_2\text{N}_5\text{O}_6\text{Na}$  778.3565; Found 778.3585.

Spectral data for 3,5-[(1,2-dimethoxy)-N,N-dimethylaniline]-1,7-dimethyl-8-aniline-4,4-difluoroboradiazaindacene (**2b**): Column separation by dichloromethane and hexanes (v/v, 995:5) gave dark purple solid (20.5 mg, yield 85%).  $^1\text{H}$  NMR (300 MHz,  $\text{CDCl}_3$ , ppm): 7.41 (dd,  $J = 9$  Hz,  $J = 3$  Hz, 4H, Ar-H), 7.19 (t,  $J = 6$  Hz, 1H, Ar-H), 6.91 (d,  $J = 6$  Hz, 1H, Ar-H), 6.81 (d,  $J = 6$  Hz, 1H, Ar-H), 6.68 (dd,  $J = 9$  Hz,  $J = 3$  Hz, 5H, Ar-H), 6.31 (s, 2H, Pyrrole-H), 4.98 (d,  $J = 6$  Hz, 1H,  $-\text{CH}_2\text{CH}_2-$ ), 4.93 (d,  $J = 9$  Hz, 1H,  $-\text{CH}_2\text{CH}_2-$ ), 4.88 (d,  $J = 6$  Hz, 1H,  $-\text{CH}_2\text{CH}_2-$ ), 4.84 (d,  $J = 9$  Hz, 1H,  $-\text{CH}_2\text{CH}_2-$ ), 3.41 (s, 3H,  $\text{OCH}_3$ ), 3.40 (s, 3H,  $\text{OCH}_3$ ), 3.37 (s, 3H,  $\text{OCH}_3$ ), 3.36 (s, 3H,  $\text{OCH}_3$ ), 2.91 (s, 12H,  $\text{N}(\text{CH}_3)_2$ ), 1.52 (s, 6H,  $\text{CH}_3$ ).  $^{13}\text{C}\{^1\text{H}\}$  NMR (125 MHz,  $\text{CDCl}_3$ , ppm): 151.9, 149.8, 143.1, 135.3, 130.2, 124.2, 123.7, 120.5, 116.0, 112.8, 106.9, 55.1, 54.6, 40.9, 14.2. HRMS (ESI-MS) m/z:  $[\text{M}+\text{Na}]^+$  Calcd for  $\text{C}_{41}\text{H}_{50}\text{BF}_2\text{N}_5\text{O}_4\text{Na}$  748.3823; Found 748.3857.

Spectral data for 3-[(1,2-diethoxy)-N,N-dimethylaniline]-5-(N,N-dimethylaniline)-1,7-dimethyl-8-aniline-4,4-difluoroboradiazaindacene (**3**): Column separation by dichloromethane and hexanes (v/v, 92:8) gave dark blue solid (21.1 mg, yield 90 %).  $^1\text{H}$  NMR (500 MHz,  $\text{CDCl}_3$ , ppm): 7.52 (d,  $J = 10$  Hz, 3H, Ar-H), 7.48 (d,  $J = 10$  Hz, 2H, Ar-H), 7.23-7.21 (m, 1H, Ar-H), 7.19 (d,  $J = 10$  Hz, 1H, Ar-H), 7.04 (d,  $J = 10$  Hz, 1H, Ar-H), 6.94 (d,  $J = 10$  Hz, 1H, Ar-H), 6.85-6.82 (m, 1H, Ar-H), 6.72 (d,  $J = 10$  Hz, 4H, Ar-H), 6.57 (s, 1H, Pyrrole-H), 6.40 (s, 1H, Pyrrole-H), 5.00 (d,  $J = 5$  Hz, 1H,  $-\text{CH}_2\text{CH}_2-$ ), 4.95 (d,  $J = 5$  Hz, 1H,  $-\text{CH}_2\text{CH}_2-$ ), 3.79-3.69 (m, 4H,  $-\text{OCH}_2-$ ), 3.04 (s, 6H,  $\text{N}(\text{CH}_3)_2$ ), 2.91 (s, 6H,  $\text{N}(\text{CH}_3)_2$ ), 1.57 (s, 6H,  $\text{CH}_3$ ), 1.18 (t,  $J = 5$  Hz, 3H,  $\text{CH}_3$ ), 1.14 (t,  $J = 5$  Hz, 3H,  $\text{CH}_3$ ).  $^{13}\text{C}\{^1\text{H}\}$  NMR (125 MHz,  $\text{CDCl}_3$ , ppm): 154.9, 151.2, 149.7, 144.0, 137.5, 130.5, 130.2, 129.5, 127.5, 125.1, 120.3, 119.1, 117.6, 115.7, 115.1, 112.8, 112.2, 105.0, 62.9, 62.5, 40.9, 40.2, 15.3, 14.0. HRMS (ESI-MS)  $m/z$ :  $[\text{M}+\text{Na}]^+$  Calcd for  $\text{C}_{41}\text{H}_{48}\text{BF}_2\text{N}_5\text{O}_4\text{Na}$  714.3768; Found 714.3774.

Spectral data for 1-(1,2-dimethoxy-2-phenylethyl)-4-methoxybenzene (**14**): Column separation by dichloromethane and hexanes (v/v, 4:6) gave light yellow oil (34.6 mg, yield 80%).  $^1\text{H}$  NMR (300 MHz,  $\text{CDCl}_3$ , ppm): 7.45-7.28 (m, 7H, Ar-H), 6.95 (d,  $J = 9$  Hz, 2H, Ar-H), 5.07 (d,  $J = 9$  Hz, 1H,  $\text{CH}_3\text{OCH}-$ ), 4.33 (d,  $J = 6$  Hz, 1H,  $\text{CH}_3\text{OCH}-$ ), 3.81 (s, 3H, Ar- $\text{OCH}_3$ ), 3.41 (s, 3H,  $\text{CH}_3\text{OCH}-$ ), 3.40 (s, 3H,  $\text{CH}_3\text{OCH}-$ );  $^{13}\text{C}\{^1\text{H}\}$  NMR (75 MHz,  $\text{CDCl}_3$ , ppm): 158.1, 141.5, 133.2, 129.6, 128.6, 128.2, 126.2, 113.7, 106.6, 54.9, 53.9, 53.6. ESI-HRMS:  $m/z$  calcd for  $[\text{M}+\text{Na}]^+$   $\text{C}_{17}\text{H}_{20}\text{O}_3\text{Na}$ , 295.1305; found 295.1307.

Spectral data for 4-(1,2-dimethoxy-2-phenylethyl)-N,N-dimethylaniline (**15**): Column separation by dichloromethane and hexanes (v/v, 9:1) gave yellow waxy (38.4 mg, yield 84%).  $^1\text{H}$  NMR (300 MHz,  $\text{CDCl}_3$ , ppm): 7.31-7.28 (m, 3H, Ar-H), 7.17 (d,  $J = 9$  Hz, 4H, Ar-H), 6.68 (d,  $J = 9$  Hz, 2H, Ar-H), 4.94 (d,  $J = 6$  Hz, 1H,  $\text{CH}_3\text{OCH}-$ ), 4.14 (d,  $J = 6$  Hz, 1H,  $\text{CH}_3\text{OCH}-$ ), 3.31 (s, 3H,  $\text{CH}_3\text{OCH}-$ ), 3.30 (s, 3H,  $\text{CH}_3\text{OCH}-$ ), 2.90 (s, 6H,  $\text{N}(\text{CH}_3)_2$ );  $^{13}\text{C}\{^1\text{H}\}$  NMR (75 MHz,  $\text{CDCl}_3$ , ppm): 149.4, 142.1, 129.5, 128.8, 128.4, 126.3, 112.9, 107.0, 54.2, 53.8, 40.8. APCI-HRMS:  $m/z$  calcd for  $[\text{M}+\text{H}]^+$   $\text{C}_{18}\text{H}_{24}\text{NO}_2$ , 286.1802; found 286.1805.

Spectral data for (1-bromo-2-methoxypropan-2-yl) benzene (**17**): Column separation by hexanes gave colorless oil (24.9 mg, yield 68%).  $^1\text{H}$  NMR (300 MHz,  $\text{CDCl}_3$ , ppm): 7.43-7.31 (m, 5H, Ar-H), 3.64 (d,  $J=9$  Hz, 1H), 3.51 (d,  $J = 12$  Hz, 1H), 3.15 (s, 3H,  $\text{CH}_3\text{O}$ ), 1.71 (s, 3H,  $\text{CH}_3$ );  $^{13}\text{C}\{^1\text{H}\}$  NMR (75 MHz,  $\text{CDCl}_3$ , ppm): 141.9, 128.6, 128.0, 126.6, 78.0, 51.2, 43.3, 22.0. APCI-MS:  $m/z$  calcd for  $[\text{M}-\text{OCH}_3]^+$   $\text{C}_9\text{H}_{10}\text{Br}^+$ , 198.1; found 199.0. calcd for  $[\text{M}-\text{Br}]^+$   $\text{C}_{10}\text{H}_{13}\text{O}^+$ , 149.1; found 149.1.

Spectral data for 1-(2-bromo-1-methoxyethyl)-4-methoxybenzene (**19**): Column separation by dichloromethane and hexanes (v/v, 6:4) gave light yellow oil (29.0 mg, yield 74%).  $^1\text{H}$  NMR (300 MHz,  $\text{CDCl}_3$ ,

ppm): 7.29 (d,  $J = 9$  Hz, 2H, Ar-H), 6.95 (d,  $J = 9$  Hz, 2H, Ar-H), 4.38 (dd,  $J = 9$  Hz,  $J = 6$  Hz, 1H, CH<sub>3</sub>OCH-), 3.85 (s, 3H, Ar-OCH<sub>3</sub>), 3.57 (dd,  $J = 12$  Hz,  $J = 9$  Hz, 1H, BrCH<sub>2</sub>), 3.47 (dd,  $J = 9$  Hz,  $J = 3$  Hz, 1H, BrCH<sub>2</sub>), 3.32 (s, 3H, OCH<sub>3</sub>); <sup>13</sup>C{<sup>1</sup>H} NMR (75 MHz, CDCl<sub>3</sub>, ppm): 159.8, 131.0, 128.1, 114.1, 83.0, 57.1, 55.3, 36.5. EI-MS:  $m/z$  [M-Br-CH<sub>2</sub>]<sup>+</sup> C<sub>9</sub>H<sub>11</sub>O<sub>2</sub><sup>+</sup>, 151.2; found 151.1.

## References

1. M. A. Halcrow and G. Christou, *Chem. Rev.*, 1994, **94**, 2421-2481.
2. M. J. Frisch, et al. Gaussian 16, Revision A.03, Gaussian, Inc., Wallingford CT, 2016.
3. H. X. Wu, S. Krishnakumar, J. Yu, D. Liang, H. Y. Qi; Z. W. Lee, L. W. Deng and D. J. Huang, *Chem. Asian J.*, 2014, **9**, 3604-3611.

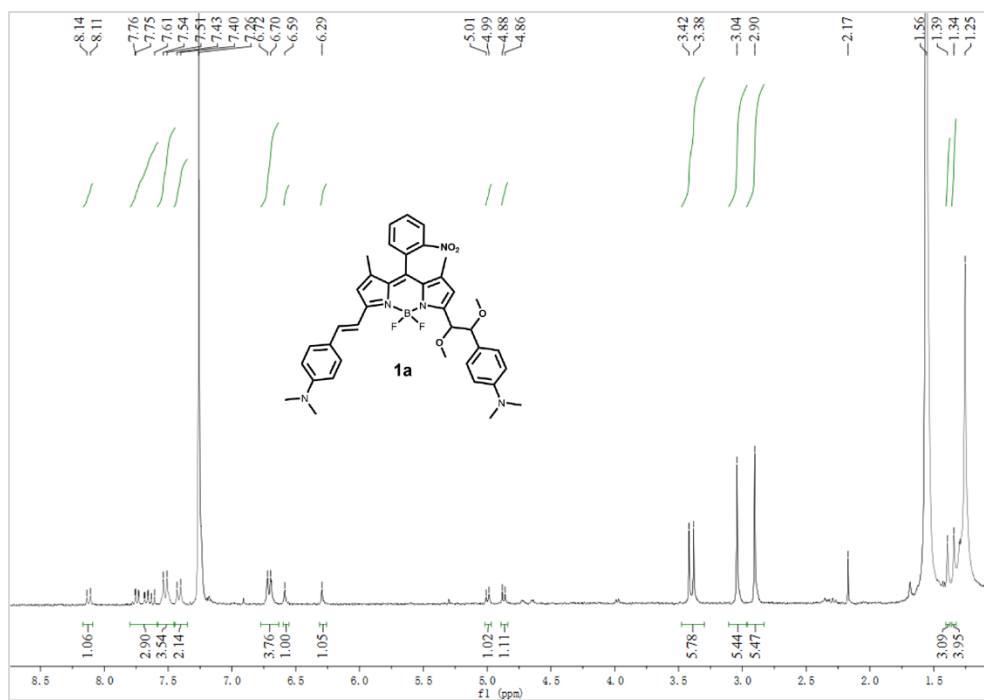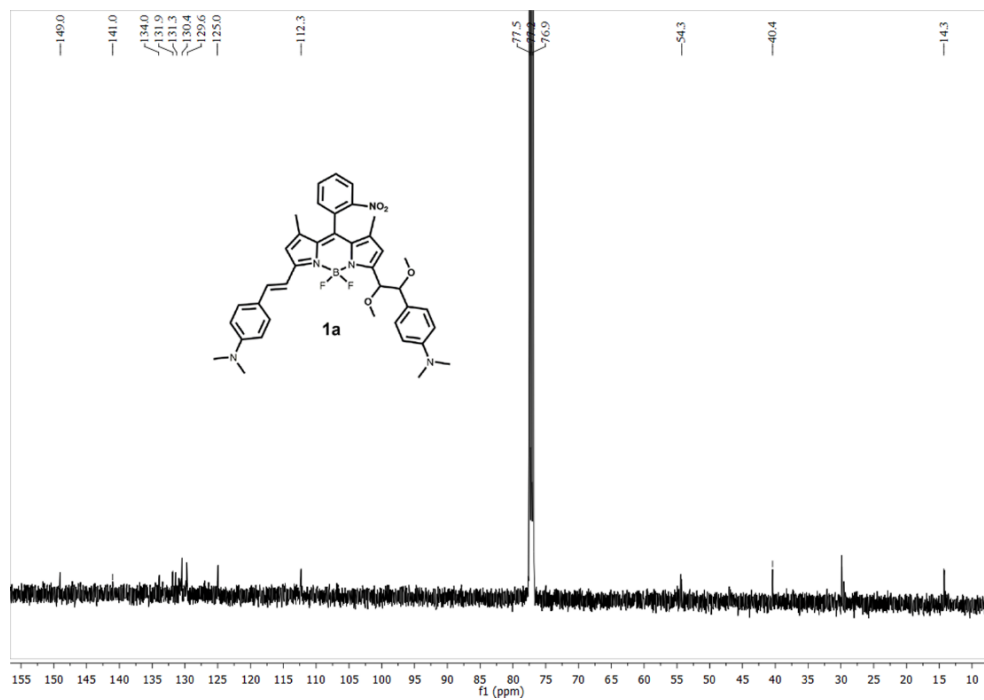

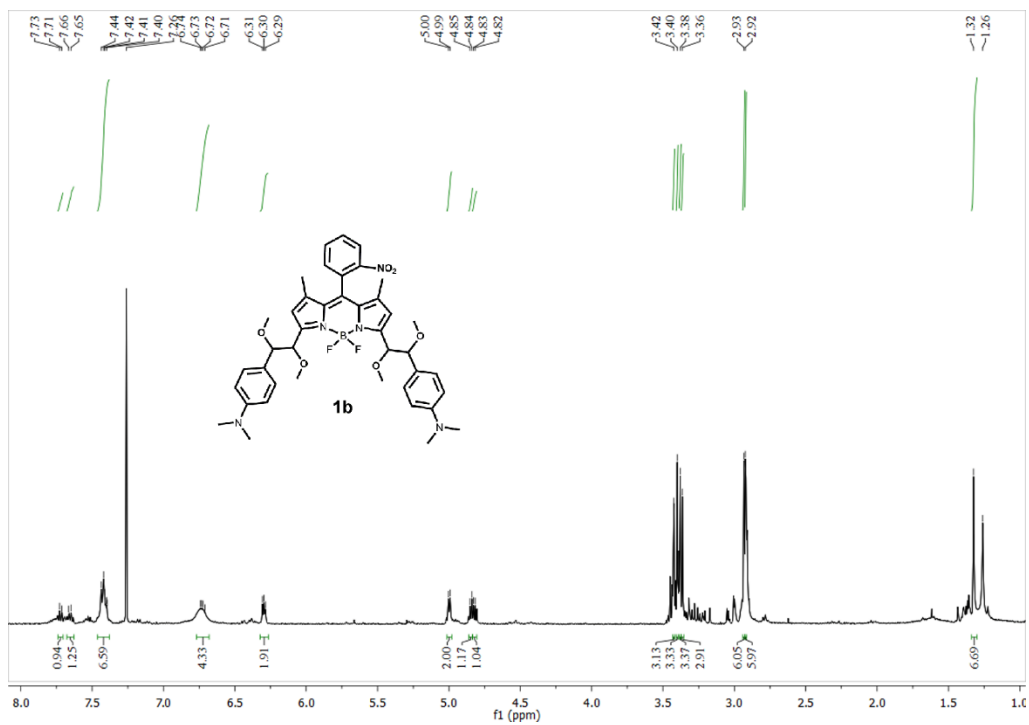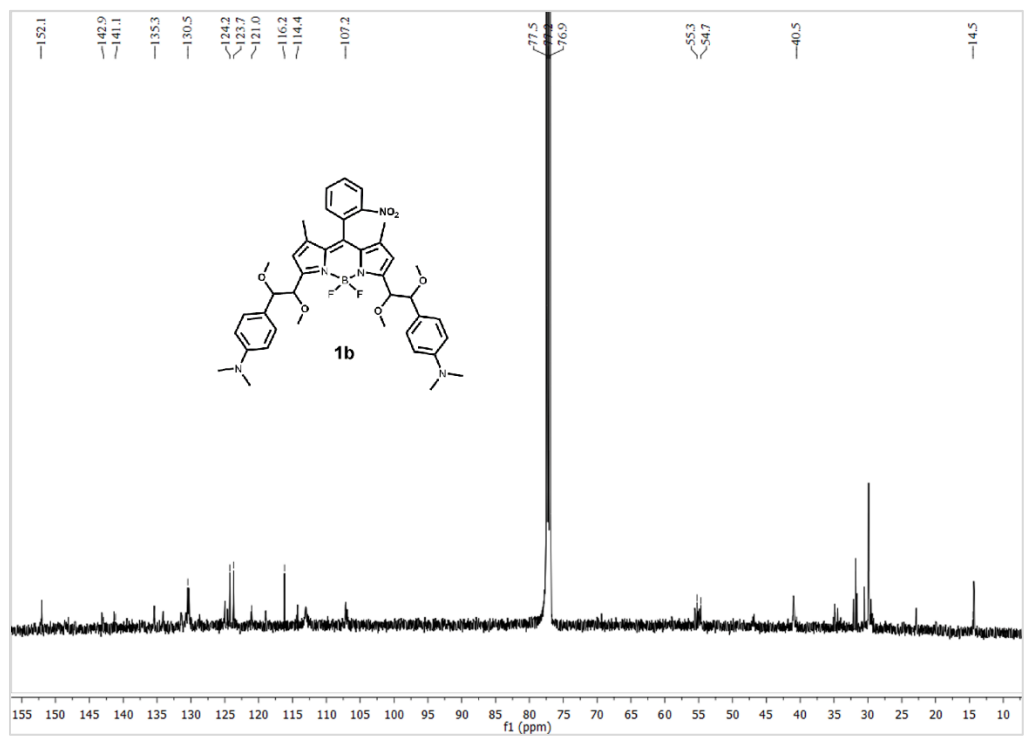

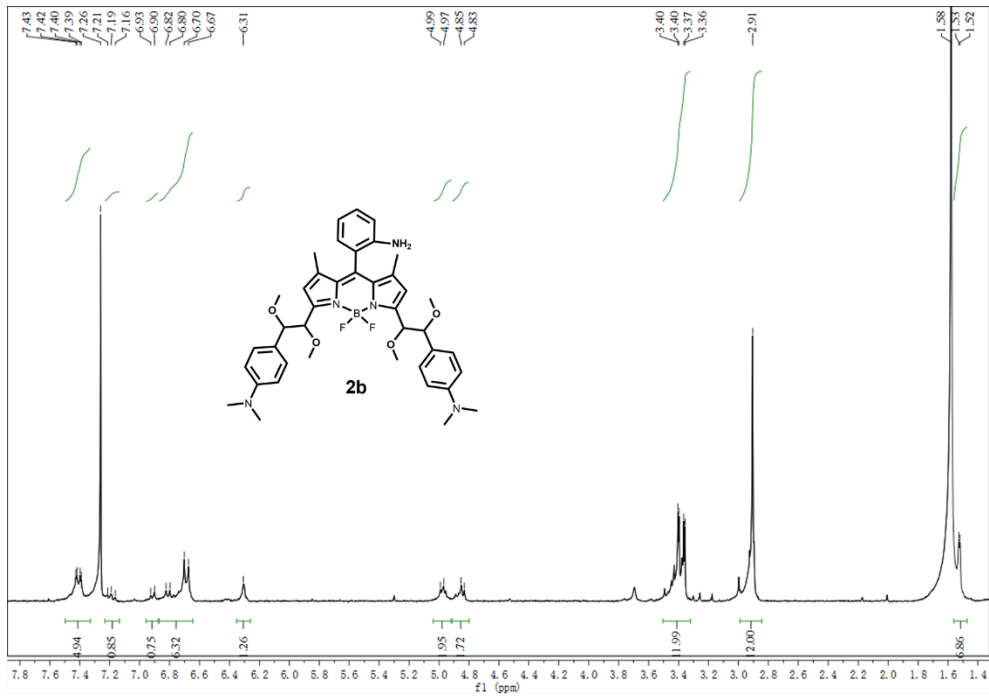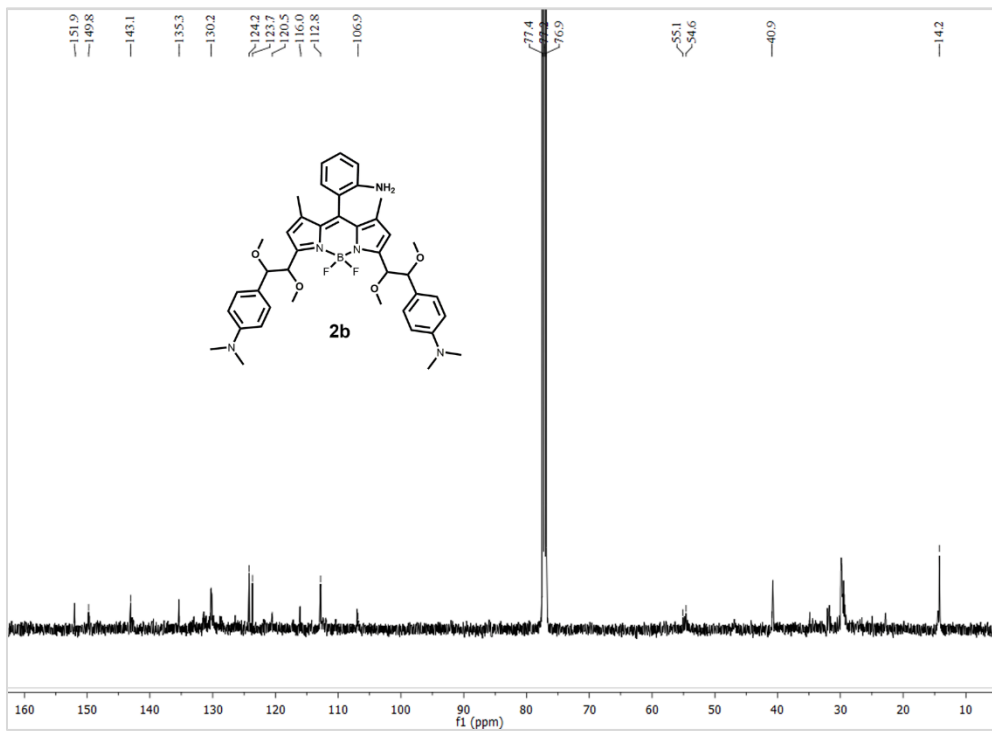



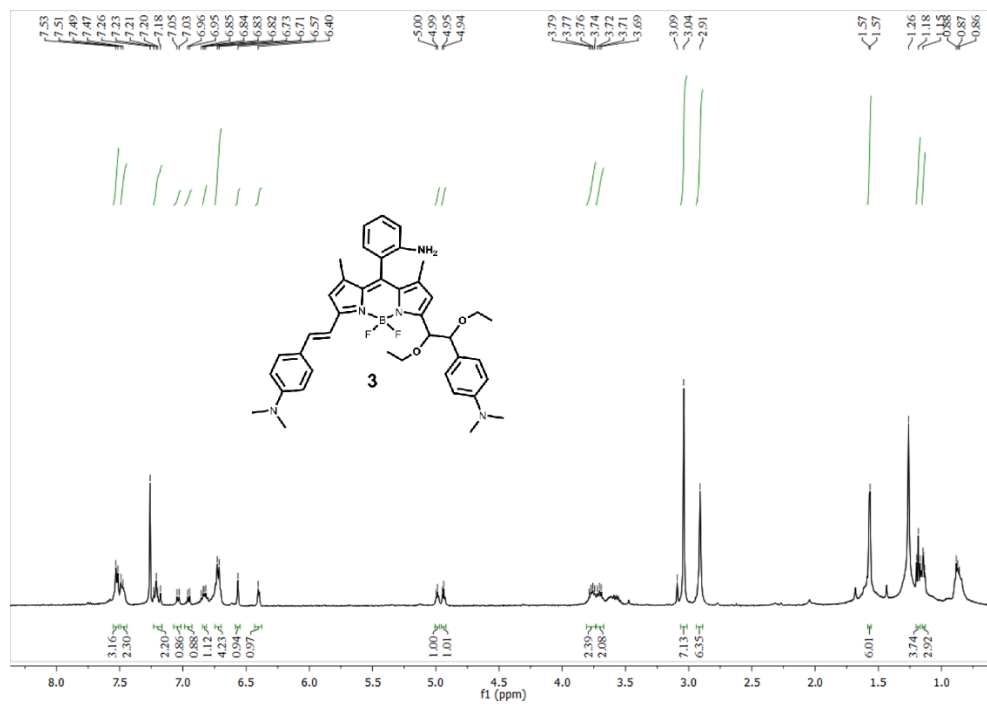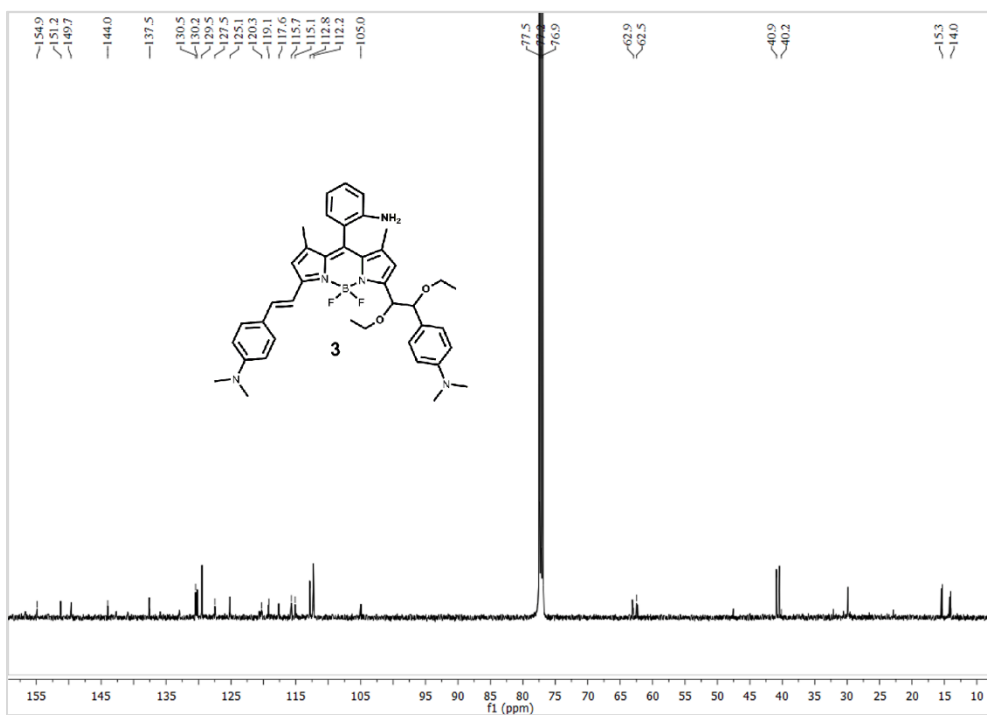

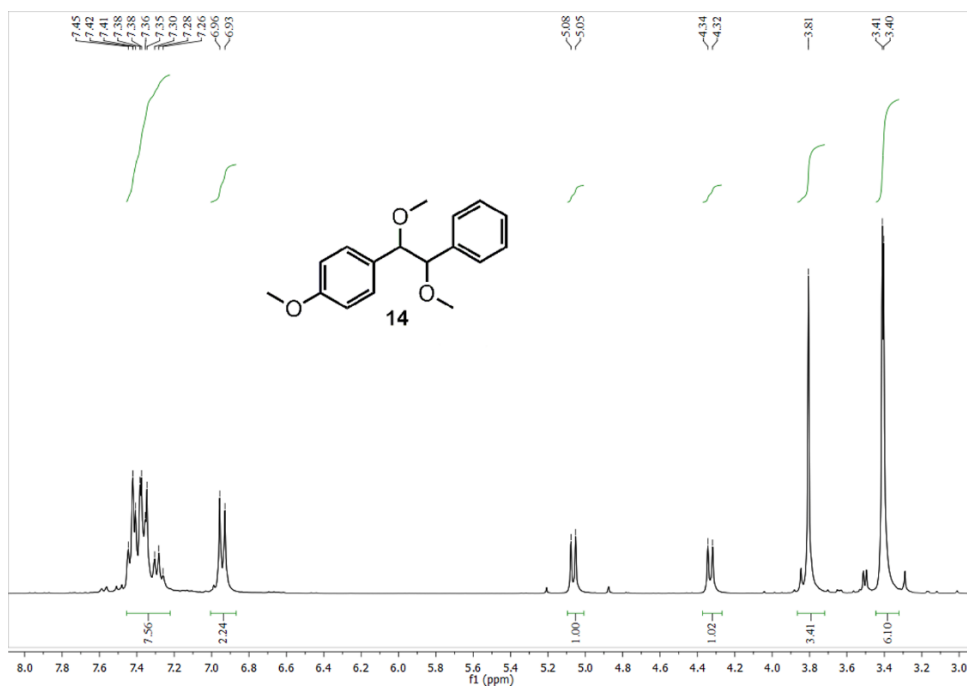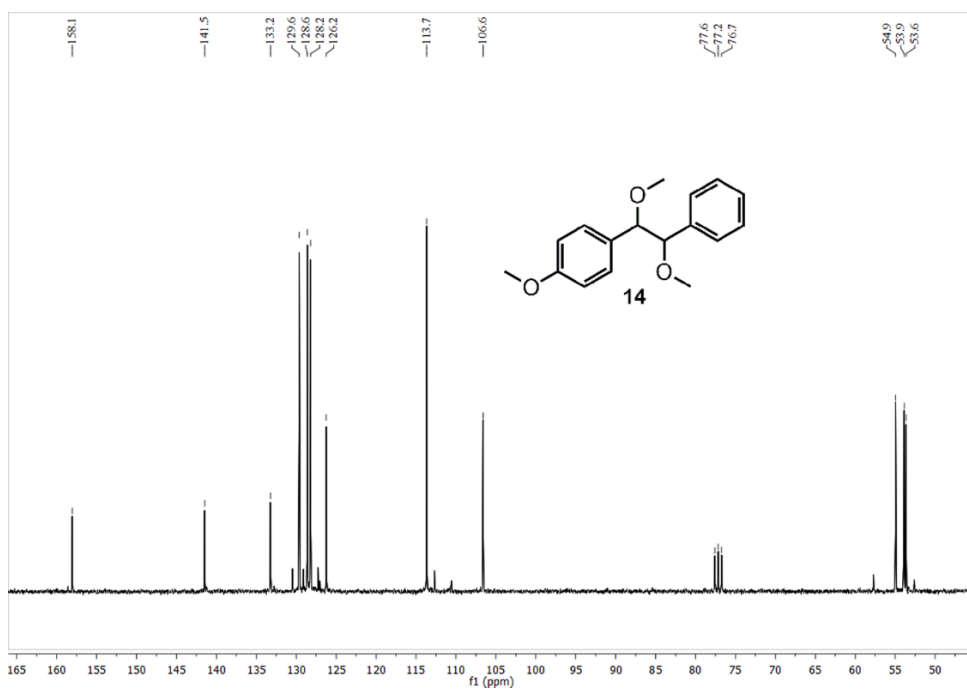

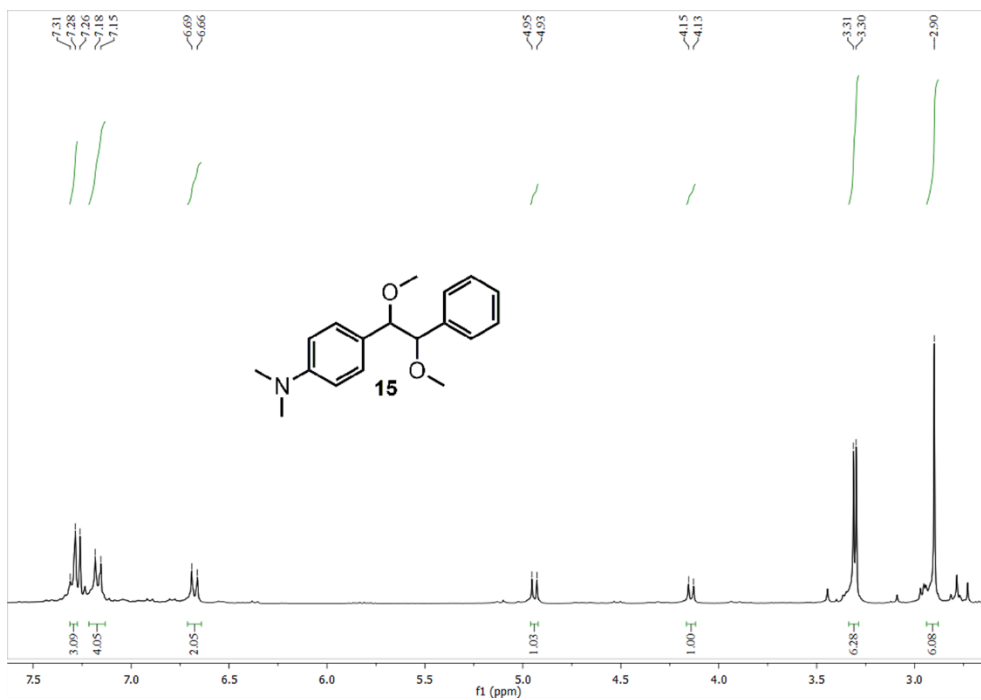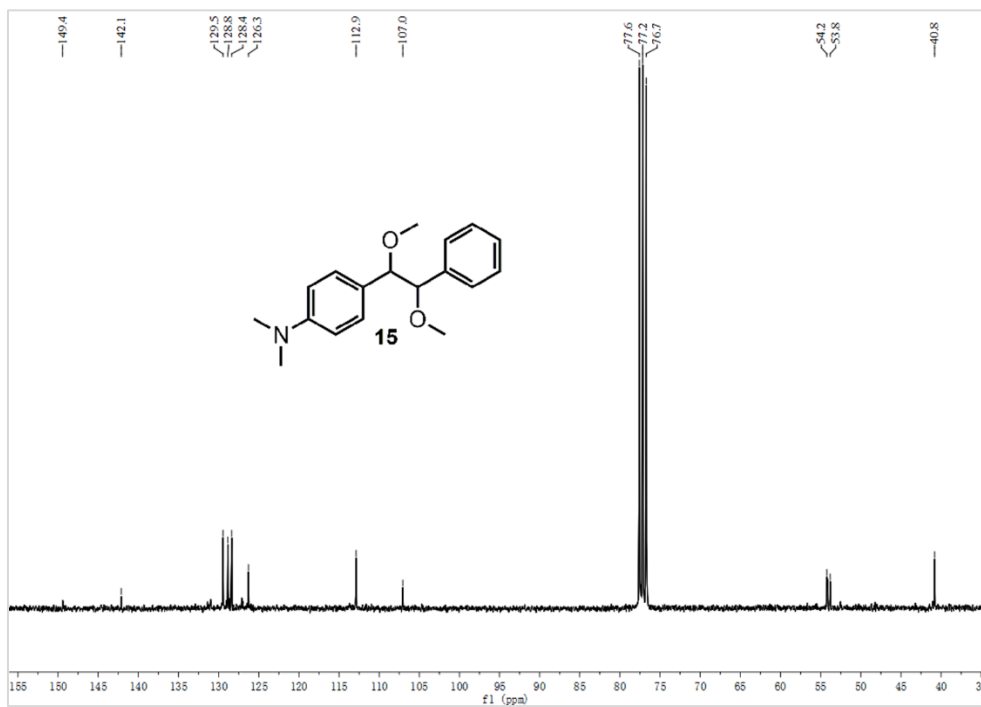

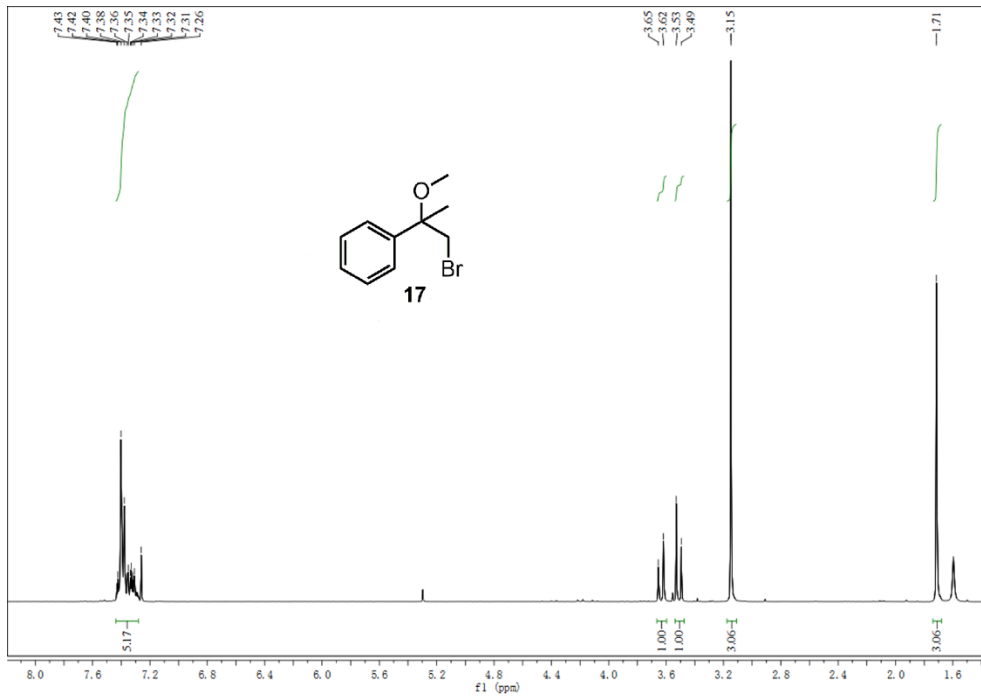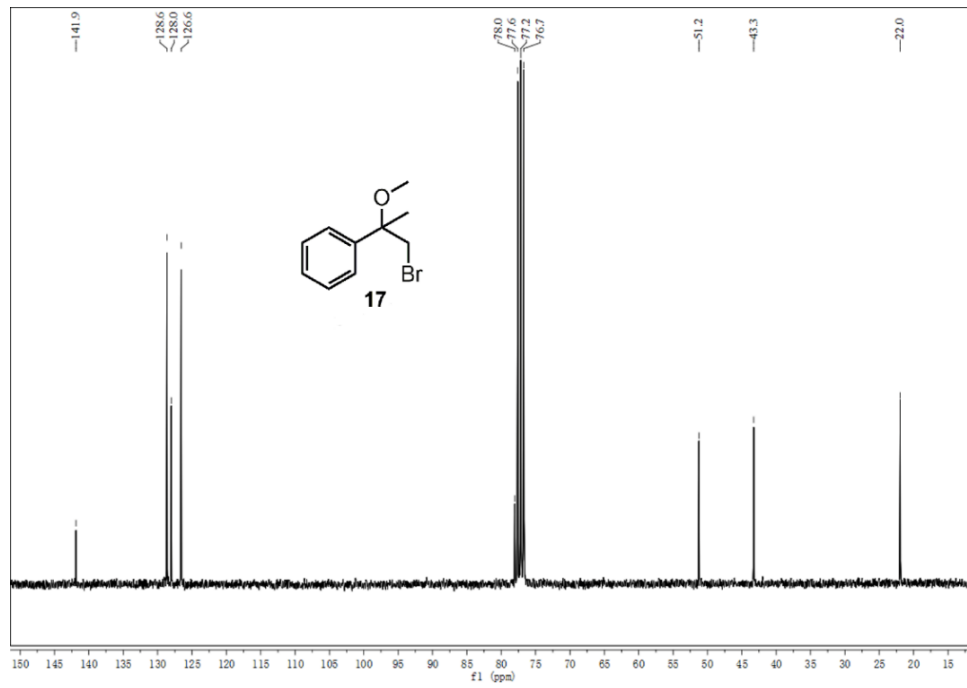

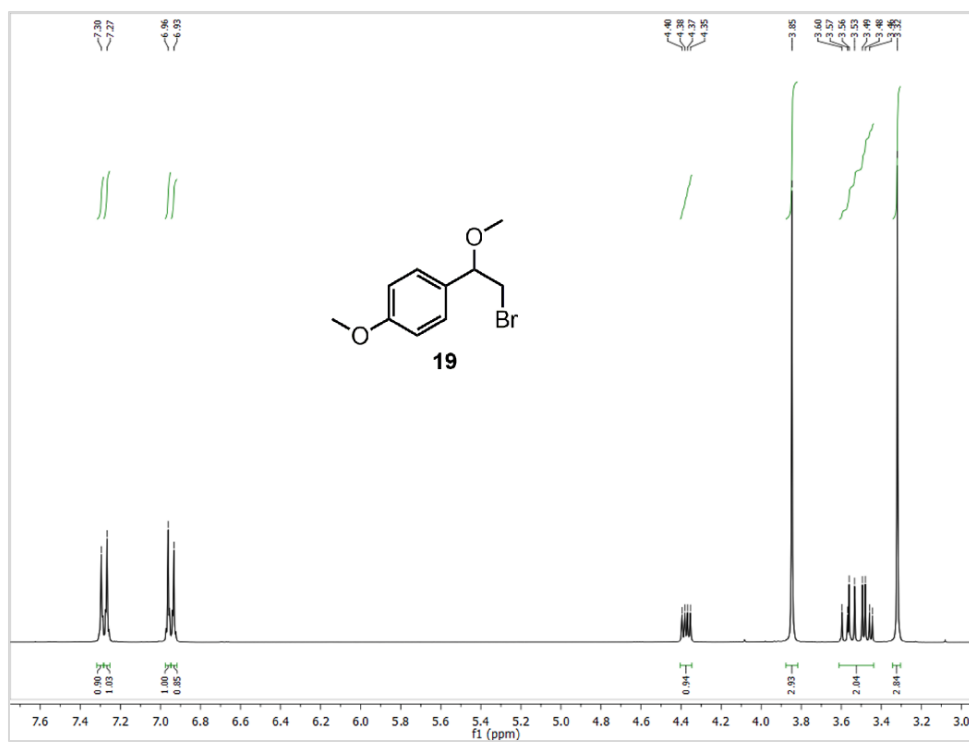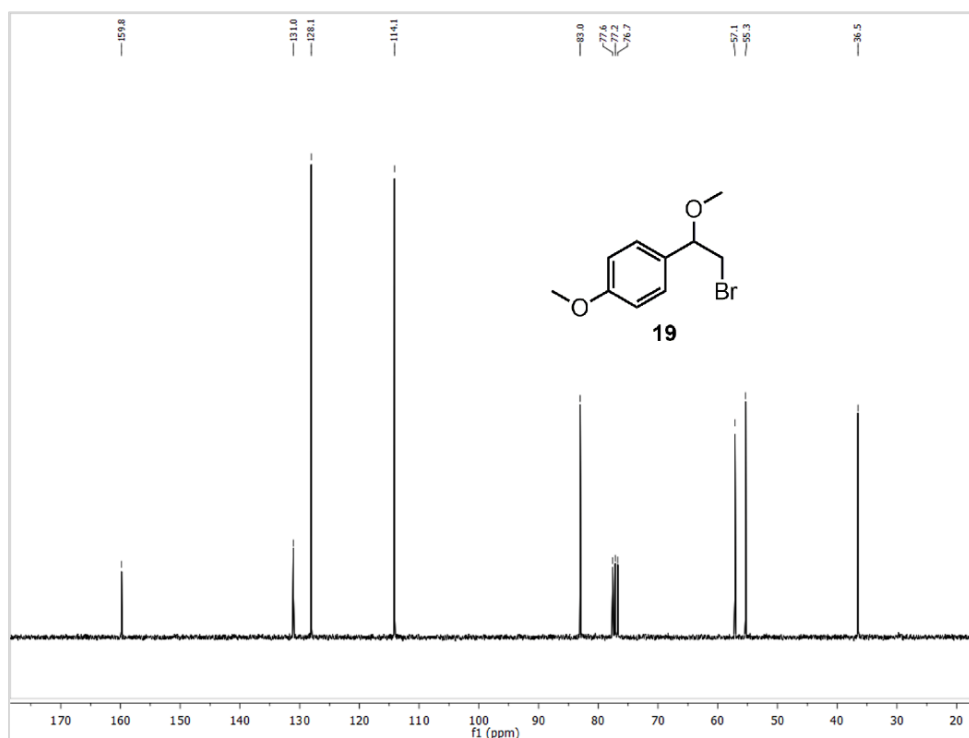

**Fig. S1** NMR spectra of alkoxyated products.

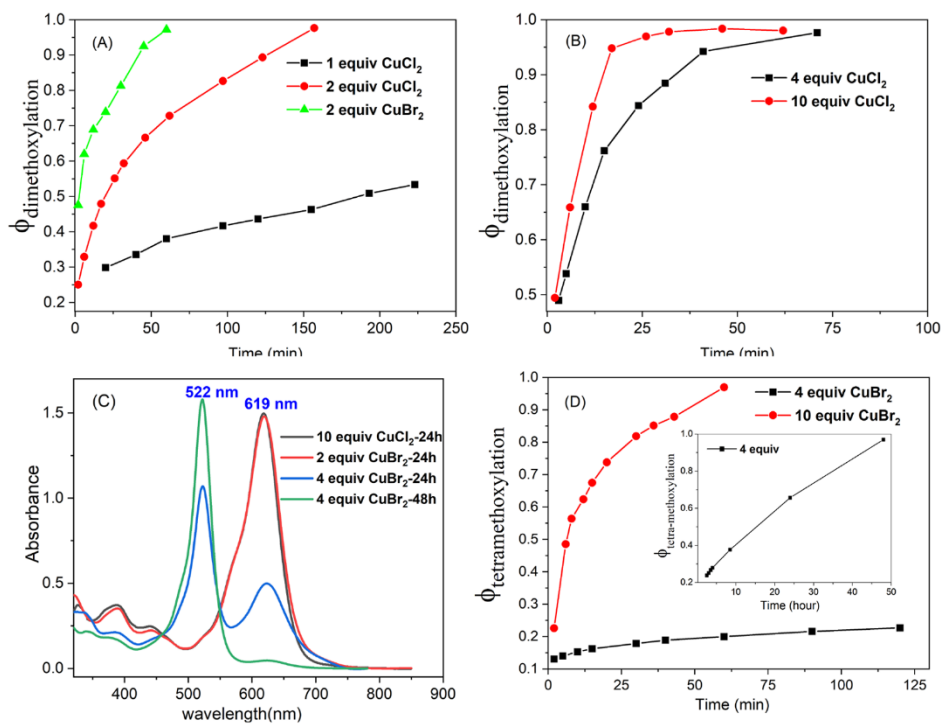

**Fig. S2** Kinetics study for dimethoxylated product **2a** and tetramethoxylated product **2b** mediated by  $\text{CuCl}_2$  and  $\text{CuBr}_2$ , respectively.

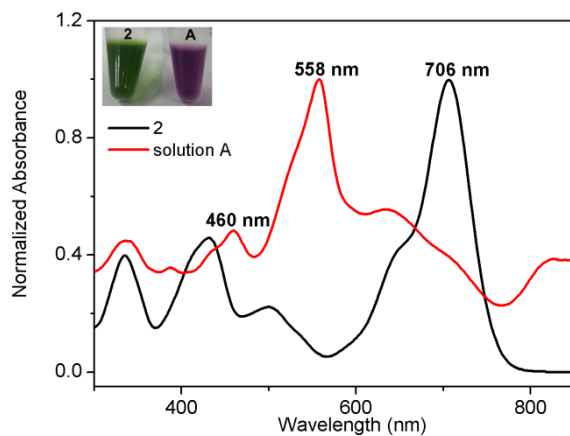

**Fig. S3** UV-Vis absorption spectra of **2** and intermediate complex **A** in  $\text{CH}_2\text{Cl}_2$ . The inset shows the photograph of **2** and solution **A** in  $\text{CH}_2\text{Cl}_2$ .

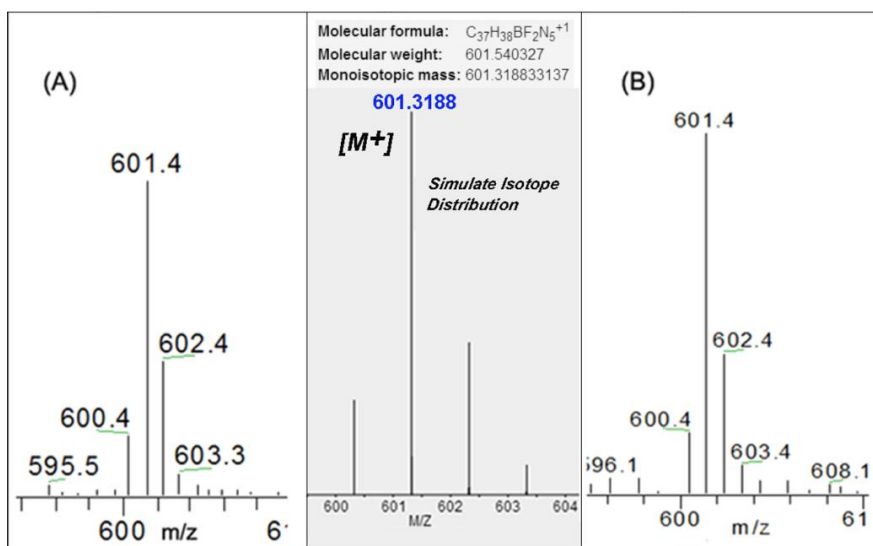

**Fig. S4** ESI-MS spectra (positive mode) of radical cation of **2**. (A) Solution A formed by dissolving complex A in CH<sub>2</sub>Cl<sub>2</sub>. (B) the pink solution of **2** after titrating Cp<sub>2</sub>FePF<sub>6</sub>.

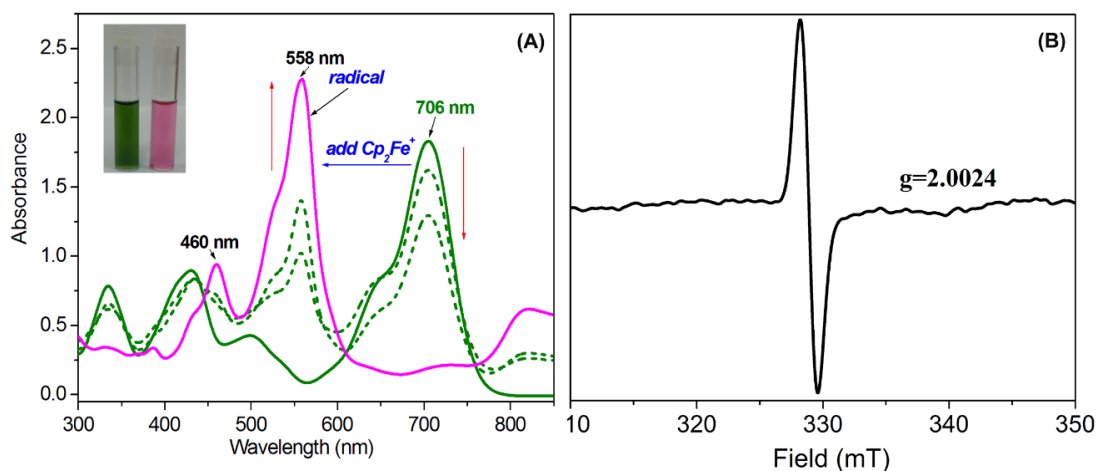

**Fig. S5** (A) UV-Vis absorption spectra of radical cation formed by titrating **2** with Cp<sub>2</sub>FePF<sub>6</sub> in CH<sub>2</sub>Cl<sub>2</sub>. The inset shows the photograph of **2** (Left) and its radical cation (Right) in CH<sub>2</sub>Cl<sub>2</sub>. (B) ESR spectrum of radical cation which was generated by titrating Cp<sub>2</sub>FePF<sub>6</sub> to **2** in CH<sub>2</sub>Cl<sub>2</sub>.

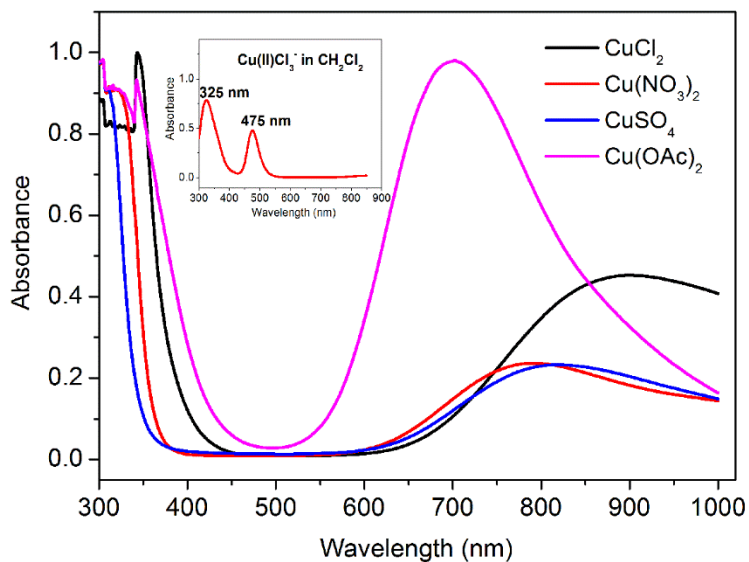

**Fig. S6** UV-Vis absorption spectra of different copper salts in MeOH. The inset one was  $\text{Cu(II)Cl}_3^-$  in  $\text{CH}_2\text{Cl}_2$ .

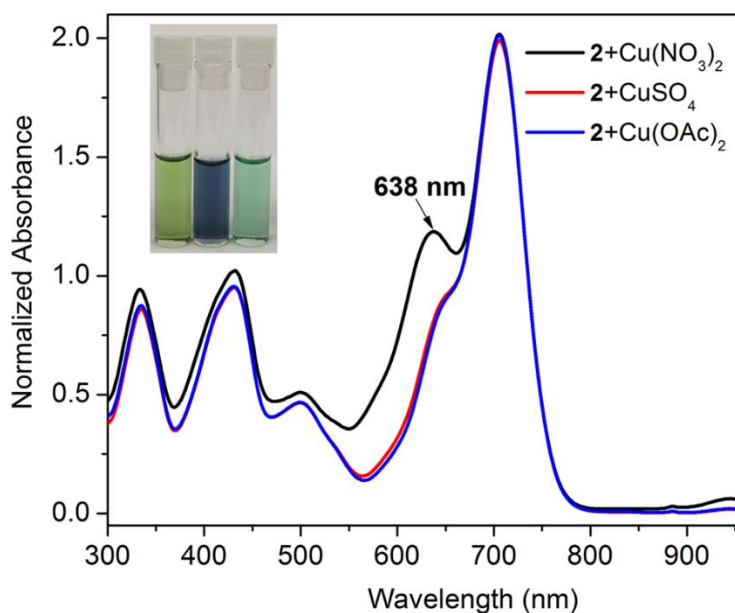

**Fig. S7.** UV-Vis absorption spectra of samples in  $\text{CH}_2\text{Cl}_2$ . Samples were prepared by **2** mixing with different kinds of 10 equiv. copper salts for 4 hours in a mixture solution of  $\text{CH}_2\text{Cl}_2$  and MeOH ( $v/v=10:1$ ), then the mixture solution were washed with deionized water twice. The inset shows the photograph of **2** only, **2** with  $\text{Cu(NO}_3)_2$  before and after washing with water twice, respectively (from left to right).



Cartesian coordinates, number of imaginary frequencies, computed total energies of optimized structures.

**Compound 2**, no imaginary frequencies, E(RB3LYP) = -1931.31531888 A.U.

---

| Center | Atomic | Atomic | Coordinates (Angstroms) |           |           |
|--------|--------|--------|-------------------------|-----------|-----------|
| Number | Number | Type   | X                       | Y         | Z         |
| 1      | 6      | 0      | -7.318119               | -0.008898 | -1.534526 |
| 2      | 6      | 0      | -5.927046               | -0.010127 | -1.432944 |
| 3      | 6      | 0      | -5.283106               | -0.012451 | -0.189404 |
| 4      | 6      | 0      | -6.058021               | -0.013212 | 0.993443  |
| 5      | 6      | 0      | -7.461154               | -0.009361 | 0.882909  |
| 6      | 6      | 0      | -8.080890               | -0.008168 | -0.363029 |
| 7      | 6      | 0      | -3.787907               | -0.010152 | -0.128144 |
| 8      | 6      | 0      | -3.087064               | -1.229025 | -0.112656 |
| 9      | 7      | 0      | -1.690474               | -1.250809 | -0.091924 |
| 10     | 5      | 0      | -0.798331               | -0.002234 | 0.136445  |
| 11     | 7      | 0      | -1.695960               | 1.242370  | -0.095085 |
| 12     | 6      | 0      | -3.092384               | 1.214276  | -0.120452 |
| 13     | 6      | 0      | -3.550513               | -2.590684 | -0.139933 |
| 14     | 6      | 0      | -2.418851               | -3.385666 | -0.139098 |

|    |   |   |           |           |           |
|----|---|---|-----------|-----------|-----------|
| 15 | 6 | 0 | -1.270420 | -2.549952 | -0.107137 |
| 16 | 6 | 0 | -1.280580 | 2.542892  | -0.119240 |
| 17 | 6 | 0 | -2.431697 | 3.373504  | -0.163530 |
| 18 | 6 | 0 | -3.560767 | 2.574053  | -0.163484 |
| 19 | 6 | 0 | 0.118211  | -2.923005 | -0.106938 |
| 20 | 6 | 0 | 0.556633  | -4.207625 | -0.007641 |
| 21 | 6 | 0 | 1.930484  | -4.670606 | -0.011417 |
| 22 | 6 | 0 | 0.106828  | 2.921621  | -0.114604 |
| 23 | 6 | 0 | 0.539580  | 4.208268  | -0.018664 |
| 24 | 6 | 0 | 1.911700  | 4.676846  | -0.016710 |
| 25 | 6 | 0 | 2.198408  | -6.051146 | 0.105311  |
| 26 | 6 | 0 | 3.487124  | -6.560692 | 0.107832  |
| 27 | 6 | 0 | 4.609183  | -5.700754 | -0.009058 |
| 28 | 6 | 0 | 4.346720  | -4.308254 | -0.125667 |
| 29 | 6 | 0 | 3.052537  | -3.819316 | -0.126027 |
| 30 | 6 | 0 | 2.173465  | 6.058789  | 0.096703  |
| 31 | 6 | 0 | 3.460156  | 6.573479  | 0.105411  |
| 32 | 6 | 0 | 4.586286  | 5.717625  | -0.001551 |
| 33 | 6 | 0 | 4.330010  | 4.323726  | -0.114867 |
| 34 | 6 | 0 | 3.037754  | 3.829651  | -0.121513 |
| 35 | 7 | 0 | 5.893640  | -6.189492 | -0.009790 |

|    |   |   |           |           |           |
|----|---|---|-----------|-----------|-----------|
| 36 | 6 | 0 | 7.024851  | -5.281026 | -0.132299 |
| 37 | 6 | 0 | 6.131492  | -7.619246 | 0.125693  |
| 38 | 7 | 0 | 5.868825  | 6.211477  | 0.003892  |
| 39 | 6 | 0 | 7.004435  | 5.306810  | -0.105211 |
| 40 | 6 | 0 | 6.100234  | 7.642242  | 0.139636  |
| 41 | 6 | 0 | -4.956596 | -3.114414 | -0.160108 |
| 42 | 6 | 0 | -4.967479 | 3.096517  | -0.207702 |
| 43 | 9 | 0 | -0.294429 | 0.000977  | 1.442871  |
| 44 | 9 | 0 | 0.272972  | -0.000529 | -0.773105 |
| 45 | 7 | 0 | -5.453275 | -0.084472 | 2.249003  |
| 46 | 1 | 0 | -7.796887 | -0.007191 | -2.509072 |
| 47 | 1 | 0 | -5.316384 | -0.006966 | -2.332323 |
| 48 | 1 | 0 | -8.060517 | -0.010239 | 1.790498  |
| 49 | 1 | 0 | -9.166451 | -0.003761 | -0.417422 |
| 50 | 1 | 0 | -2.408097 | -4.467015 | -0.174581 |
| 51 | 1 | 0 | 0.829387  | -2.110776 | -0.202183 |
| 52 | 1 | 0 | -0.186393 | -4.998588 | 0.090225  |
| 53 | 1 | 0 | 0.821623  | 2.111777  | -0.202553 |
| 54 | 1 | 0 | -0.207109 | 4.996683  | 0.072052  |
| 55 | 1 | 0 | 1.363589  | -6.742865 | 0.196492  |
| 56 | 1 | 0 | 3.625439  | -7.631144 | 0.200034  |

|    |   |   |           |           |           |
|----|---|---|-----------|-----------|-----------|
| 57 | 1 | 0 | 5.166888  | -3.606177 | -0.215455 |
| 58 | 1 | 0 | 2.909558  | -2.746355 | -0.216757 |
| 59 | 1 | 0 | 1.335403  | 6.747545  | 0.180383  |
| 60 | 1 | 0 | 3.593654  | 7.644787  | 0.194836  |
| 61 | 1 | 0 | 5.153468  | 3.624556  | -0.196914 |
| 62 | 1 | 0 | 2.899591  | 2.755802  | -0.209270 |
| 63 | 1 | 0 | 7.063236  | -4.563257 | 0.698343  |
| 64 | 1 | 0 | 7.949276  | -5.858979 | -0.122536 |
| 65 | 1 | 0 | 6.989326  | -4.713286 | -1.071680 |
| 66 | 1 | 0 | 5.730630  | -8.009970 | 1.070778  |
| 67 | 1 | 0 | 5.676190  | -8.186602 | -0.697301 |
| 68 | 1 | 0 | 7.205586  | -7.805977 | 0.111405  |
| 69 | 1 | 0 | 6.977260  | 4.733114  | -1.041194 |
| 70 | 1 | 0 | 7.926460  | 5.888555  | -0.093281 |
| 71 | 1 | 0 | 7.040347  | 4.594350  | 0.730163  |
| 72 | 1 | 0 | 5.692897  | 8.032245  | 1.082304  |
| 73 | 1 | 0 | 7.173620  | 7.833327  | 0.130612  |
| 74 | 1 | 0 | 5.646939  | 8.207008  | -0.686199 |
| 75 | 1 | 0 | -5.513899 | -2.773302 | -1.038502 |
| 76 | 1 | 0 | -4.941721 | -4.208865 | -0.169049 |
| 77 | 1 | 0 | -5.521596 | -2.789950 | 0.720290  |

|    |   |   |           |          |           |
|----|---|---|-----------|----------|-----------|
| 78 | 1 | 0 | -4.952657 | 4.190875 | -0.221987 |
| 79 | 1 | 0 | -5.509582 | 2.751018 | -1.093843 |
| 80 | 1 | 0 | -5.551470 | 2.778109 | 0.662484  |
| 81 | 1 | 0 | -6.020047 | 0.263701 | 3.013371  |
| 82 | 1 | 0 | -4.507942 | 0.277832 | 2.294878  |
| 83 | 1 | 0 | -2.425108 | 4.454477 | -0.210161 |

-----

**Cation of Compound 2 (2<sup>+</sup>), no imaginary frequencies, E(UB3LYP) = -1931.15504036 A.U.**

-----

| Center<br>Number | Atomic<br>Number | Atomic<br>Type | Coordinates (Angstroms) |           |           |
|------------------|------------------|----------------|-------------------------|-----------|-----------|
|                  |                  |                | X                       | Y         | Z         |
| 1                | 6                | 0              | -7.246341               | 0.149227  | -1.585076 |
| 2                | 6                | 0              | -5.858940               | 0.136481  | -1.452201 |
| 3                | 6                | 0              | -5.245168               | 0.062684  | -0.194461 |
| 4                | 6                | 0              | -6.046350               | -0.000701 | 0.969204  |
| 5                | 6                | 0              | -7.446607               | 0.017574  | 0.825428  |
| 6                | 6                | 0              | -8.035880               | 0.089857  | -0.432372 |
| 7                | 6                | 0              | -3.752392               | 0.047141  | -0.101887 |
| 8                | 6                | 0              | -3.055975               | -1.178034 | -0.087214 |

|    |   |   |           |           |           |
|----|---|---|-----------|-----------|-----------|
| 9  | 7 | 0 | -1.672333 | -1.218094 | -0.048707 |
| 10 | 5 | 0 | -0.764716 | 0.013893  | 0.220015  |
| 11 | 7 | 0 | -1.644385 | 1.265465  | -0.054917 |
| 12 | 6 | 0 | -3.029596 | 1.256475  | -0.089967 |
| 13 | 6 | 0 | -3.549417 | -2.545600 | -0.144967 |
| 14 | 6 | 0 | -2.439858 | -3.351305 | -0.143209 |
| 15 | 6 | 0 | -1.267048 | -2.528559 | -0.083373 |
| 16 | 6 | 0 | -1.209397 | 2.565902  | -0.081641 |
| 17 | 6 | 0 | -2.363135 | 3.416030  | -0.130608 |
| 18 | 6 | 0 | -3.491181 | 2.636413  | -0.134688 |
| 19 | 6 | 0 | 0.091314  | -2.919336 | -0.076331 |
| 20 | 6 | 0 | 0.499273  | -4.236919 | -0.056460 |
| 21 | 6 | 0 | 1.841692  | -4.718355 | -0.047990 |
| 22 | 6 | 0 | 0.158022  | 2.924986  | -0.074852 |
| 23 | 6 | 0 | 0.597033  | 4.232127  | -0.050958 |
| 24 | 6 | 0 | 1.950502  | 4.682274  | -0.040070 |
| 25 | 6 | 0 | 2.076617  | -6.119589 | -0.033182 |
| 26 | 6 | 0 | 3.345543  | -6.652262 | -0.024978 |
| 27 | 6 | 0 | 4.491748  | -5.802865 | -0.029613 |
| 28 | 6 | 0 | 4.263923  | -4.391532 | -0.043132 |
| 29 | 6 | 0 | 2.989102  | -3.877674 | -0.051798 |

|    |   |   |           |           |           |
|----|---|---|-----------|-----------|-----------|
| 30 | 6 | 0 | 2.217516  | 6.077625  | -0.026069 |
| 31 | 6 | 0 | 3.498484  | 6.580940  | -0.015901 |
| 32 | 6 | 0 | 4.624766  | 5.705427  | -0.017237 |
| 33 | 6 | 0 | 4.364507  | 4.299782  | -0.029112 |
| 34 | 6 | 0 | 3.078094  | 3.815412  | -0.039975 |
| 35 | 7 | 0 | 5.751430  | -6.313256 | -0.020528 |
| 36 | 6 | 0 | 6.914250  | -5.426278 | -0.023389 |
| 37 | 6 | 0 | 5.964761  | -7.759928 | -0.004641 |
| 38 | 7 | 0 | 5.896004  | 6.186652  | -0.006401 |
| 39 | 6 | 0 | 7.037711  | 5.272786  | -0.006362 |
| 40 | 6 | 0 | 6.142779  | 7.627936  | 0.008138  |
| 41 | 6 | 0 | -4.965149 | -3.033338 | -0.189953 |
| 42 | 6 | 0 | -4.894337 | 3.161532  | -0.174369 |
| 43 | 9 | 0 | -0.329815 | 0.013200  | 1.545551  |
| 44 | 9 | 0 | 0.339707  | -0.000476 | -0.640377 |
| 45 | 7 | 0 | -5.473514 | -0.151378 | 2.231192  |
| 46 | 1 | 0 | -7.702513 | 0.205140  | -2.568544 |
| 47 | 1 | 0 | -5.227726 | 0.184381  | -2.335947 |
| 48 | 1 | 0 | -8.067581 | -0.030921 | 1.716742  |
| 49 | 1 | 0 | -9.119630 | 0.102473  | -0.511727 |
| 50 | 1 | 0 | -2.444566 | -4.431443 | -0.194325 |

|    |   |   |           |           |           |
|----|---|---|-----------|-----------|-----------|
| 51 | 1 | 0 | 0.826504  | -2.124384 | -0.098260 |
| 52 | 1 | 0 | -0.267866 | -5.008762 | -0.042852 |
| 53 | 1 | 0 | 0.873942  | 2.112810  | -0.101437 |
| 54 | 1 | 0 | -0.151320 | 5.022106  | -0.036794 |
| 55 | 1 | 0 | 1.223470  | -6.793036 | -0.028936 |
| 56 | 1 | 0 | 3.463892  | -7.728159 | -0.014351 |
| 57 | 1 | 0 | 5.102850  | -3.707414 | -0.045552 |
| 58 | 1 | 0 | 2.868218  | -2.799250 | -0.059855 |
| 59 | 1 | 0 | 1.379945  | 6.770529  | -0.024405 |
| 60 | 1 | 0 | 3.641722  | 7.653799  | -0.006404 |
| 61 | 1 | 0 | 5.187389  | 3.596360  | -0.028250 |
| 62 | 1 | 0 | 2.932615  | 2.740002  | -0.045804 |
| 63 | 1 | 0 | 6.922405  | -4.778805 | 0.861147  |
| 64 | 1 | 0 | 7.820268  | -6.030464 | -0.013233 |
| 65 | 1 | 0 | 6.931004  | -4.795693 | -0.919930 |
| 66 | 1 | 0 | 5.524829  | -8.216265 | 0.889781  |
| 67 | 1 | 0 | 5.528363  | -8.235169 | -0.890846 |
| 68 | 1 | 0 | 7.035137  | -7.960815 | -0.000574 |
| 69 | 1 | 0 | 7.040882  | 4.640563  | -0.901908 |
| 70 | 1 | 0 | 7.957677  | 5.855495  | 0.004161  |
| 71 | 1 | 0 | 7.029502  | 4.626504  | 0.879043  |



|    |   |   |           |           |           |
|----|---|---|-----------|-----------|-----------|
| 72 | 1 | 0 | 5.711915  | 8.095606  | 0.901134  |
| 73 | 1 | 0 | 7.217550  | 7.803957  | 0.014035  |
| 74 | 1 | 0 | 5.719220  | 8.112174  | -0.879437 |
| 75 | 1 | 0 | -5.505412 | -2.648159 | -1.060183 |
| 76 | 1 | 0 | -4.975480 | -4.126367 | -0.232725 |
| 77 | 1 | 0 | -5.522399 | -2.719767 | 0.698767  |
| 78 | 1 | 0 | -4.877056 | 4.255009  | -0.149909 |
| 79 | 1 | 0 | -5.424918 | 2.845685  | -1.077879 |
| 80 | 1 | 0 | -5.483961 | 2.809166  | 0.678062  |
| 81 | 1 | 0 | -6.064489 | 0.129843  | 3.004690  |
| 82 | 1 | 0 | -4.532413 | 0.209076  | 2.334259  |
| 83 | 1 | 0 | -2.343022 | 4.496466  | -0.171281 |

-----  
**Compound 2a**, no imaginary frequencies, E(UB3LYP) = -2161.55333025 A.U.

-----

| Center | Atomic | Atomic | Coordinates (Angstroms) |          |          |
|--------|--------|--------|-------------------------|----------|----------|
| Number | Number | Type   | X                       | Y        | Z        |
| 1      | 6      | 0      | -7.328246               | 1.084671 | 1.414756 |
| 2      | 6      | 0      | -5.938854               | 0.973839 | 1.367061 |
| 3      | 6      | 0      | -5.260575               | 0.798649 | 0.154454 |

-----

|    |   |   |           |           |           |
|----|---|---|-----------|-----------|-----------|
| 4  | 6 | 0 | -5.995941 | 0.731010  | -1.051252 |
| 5  | 6 | 0 | -7.397695 | 0.843046  | -0.994022 |
| 6  | 6 | 0 | -8.052833 | 1.017679  | 0.221064  |
| 7  | 6 | 0 | -3.769449 | 0.677086  | 0.151911  |
| 8  | 6 | 0 | -2.976235 | 1.823132  | 0.067031  |
| 9  | 7 | 0 | -1.580887 | 1.736916  | 0.114748  |
| 10 | 5 | 0 | -0.765407 | 0.413157  | 0.113967  |
| 11 | 7 | 0 | -1.785824 | -0.747494 | 0.269818  |
| 12 | 6 | 0 | -3.176228 | -0.606132 | 0.258232  |
| 13 | 6 | 0 | -3.327469 | 3.218946  | -0.059703 |
| 14 | 6 | 0 | -2.139447 | 3.916889  | -0.076565 |
| 15 | 6 | 0 | -1.060141 | 2.990993  | 0.036147  |
| 16 | 6 | 0 | -1.485329 | -2.067268 | 0.374224  |
| 17 | 6 | 0 | -2.682373 | -2.798948 | 0.439976  |
| 18 | 6 | 0 | -3.754123 | -1.908082 | 0.367996  |
| 19 | 6 | 0 | 0.349993  | 3.253868  | 0.087101  |
| 20 | 6 | 0 | 0.890757  | 4.491625  | -0.090306 |
| 21 | 6 | 0 | 2.290966  | 4.853626  | -0.047423 |
| 22 | 6 | 0 | -0.060446 | -2.568071 | 0.436657  |
| 23 | 6 | 0 | 0.121685  | -3.892170 | -0.350119 |
| 24 | 6 | 0 | 1.529387  | -4.444068 | -0.248935 |

|    |   |   |           |           |           |
|----|---|---|-----------|-----------|-----------|
| 25 | 6 | 0 | 2.665718  | 6.199362  | -0.252073 |
| 26 | 6 | 0 | 3.986330  | 6.614598  | -0.221774 |
| 27 | 6 | 0 | 5.034139  | 5.688067  | 0.019924  |
| 28 | 6 | 0 | 4.663579  | 4.329626  | 0.223967  |
| 29 | 6 | 0 | 3.339140  | 3.935067  | 0.190346  |
| 30 | 6 | 0 | 1.792458  | -5.672992 | 0.363641  |
| 31 | 6 | 0 | 3.083466  | -6.186859 | 0.463026  |
| 32 | 6 | 0 | 4.190010  | -5.475773 | -0.056902 |
| 33 | 6 | 0 | 3.916913  | -4.245201 | -0.704951 |
| 34 | 6 | 0 | 2.621047  | -3.750094 | -0.789401 |
| 35 | 7 | 0 | 6.347855  | 6.082964  | 0.055485  |
| 36 | 6 | 0 | 7.403015  | 5.107115  | 0.294050  |
| 37 | 6 | 0 | 6.697691  | 7.480354  | -0.159423 |
| 38 | 7 | 0 | 5.485392  | -5.957330 | 0.065878  |
| 39 | 6 | 0 | 6.559292  | -5.316009 | -0.678377 |
| 40 | 6 | 0 | 5.696527  | -7.319959 | 0.530763  |
| 41 | 6 | 0 | -4.685981 | 3.844408  | -0.168857 |
| 42 | 6 | 0 | -5.197935 | -2.319610 | 0.398658  |
| 43 | 9 | 0 | -0.069114 | 0.279435  | -1.095077 |
| 44 | 9 | 0 | 0.144316  | 0.409965  | 1.175538  |
| 45 | 7 | 0 | -5.349798 | 0.626455  | -2.283645 |

|    |   |   |           |           |           |
|----|---|---|-----------|-----------|-----------|
| 46 | 1 | 0 | -7.835048 | 1.219792  | 2.365395  |
| 47 | 1 | 0 | -5.357697 | 1.020166  | 2.284541  |
| 48 | 1 | 0 | -7.967646 | 0.794065  | -1.919028 |
| 49 | 1 | 0 | -9.136576 | 1.099075  | 0.234293  |
| 50 | 1 | 0 | -2.039477 | 4.991647  | -0.147831 |
| 51 | 1 | 0 | 0.989035  | 2.402626  | 0.291070  |
| 52 | 1 | 0 | 0.215383  | 5.322330  | -0.292069 |
| 53 | 1 | 0 | 0.582812  | -1.829462 | -0.044419 |
| 54 | 1 | 0 | 1.889895  | 6.938361  | -0.440342 |
| 55 | 1 | 0 | 4.209088  | 7.661714  | -0.386531 |
| 56 | 1 | 0 | 5.423847  | 3.580857  | 0.410157  |
| 57 | 1 | 0 | 3.111959  | 2.885349  | 0.351936  |
| 58 | 1 | 0 | 0.968184  | -6.256221 | 0.770749  |
| 59 | 1 | 0 | 3.224151  | -7.148756 | 0.941238  |
| 60 | 1 | 0 | 4.721152  | -3.670975 | -1.149138 |
| 61 | 1 | 0 | 2.454710  | -2.807103 | -1.304465 |
| 62 | 1 | 0 | 7.418444  | 4.328437  | -0.480030 |
| 63 | 1 | 0 | 8.367675  | 5.614821  | 0.282118  |
| 64 | 1 | 0 | 7.288499  | 4.616849  | 1.269792  |
| 65 | 1 | 0 | 6.387895  | 7.828526  | -1.153968 |
| 66 | 1 | 0 | 6.232571  | 8.133282  | 0.590888  |

|    |   |   |           |           |           |
|----|---|---|-----------|-----------|-----------|
| 67 | 1 | 0 | 7.779137  | 7.593999  | -0.082395 |
| 68 | 1 | 0 | 6.659183  | -4.262254 | -0.394244 |
| 69 | 1 | 0 | 7.501883  | -5.811678 | -0.440073 |
| 70 | 1 | 0 | 6.410659  | -5.361983 | -1.768916 |
| 71 | 1 | 0 | 5.240941  | -8.073013 | -0.131849 |
| 72 | 1 | 0 | 6.768770  | -7.515417 | 0.584933  |
| 73 | 1 | 0 | 5.283481  | -7.459951 | 1.536390  |
| 74 | 1 | 0 | -5.304955 | 3.643104  | 0.711279  |
| 75 | 1 | 0 | -4.585263 | 4.928743  | -0.276703 |
| 76 | 1 | 0 | -5.234540 | 3.464332  | -1.037099 |
| 77 | 1 | 0 | -5.267483 | -3.406108 | 0.512353  |
| 78 | 1 | 0 | -5.745239 | -1.855441 | 1.225463  |
| 79 | 1 | 0 | -5.725047 | -2.044973 | -0.521714 |
| 80 | 1 | 0 | -5.920308 | 0.247515  | -3.030400 |
| 81 | 1 | 0 | -4.436374 | 0.188056  | -2.259425 |
| 82 | 1 | 0 | -2.764085 | -3.874994 | 0.520369  |
| 83 | 1 | 0 | -0.579147 | -4.652733 | 0.028891  |
| 84 | 8 | 0 | 0.444143  | -2.643692 | 1.772359  |
| 85 | 8 | 0 | -0.239201 | -3.553042 | -1.691047 |
| 86 | 6 | 0 | -0.233057 | -3.506462 | 2.675704  |
| 87 | 1 | 0 | -0.161373 | -4.562164 | 2.381200  |

|    |   |   |           |           |           |
|----|---|---|-----------|-----------|-----------|
| 88 | 1 | 0 | 0.266108  | -3.382013 | 3.640195  |
| 89 | 1 | 0 | -1.292083 | -3.241010 | 2.787523  |
| 90 | 6 | 0 | -0.446898 | -4.676467 | -2.530764 |
| 91 | 1 | 0 | -0.729064 | -4.289100 | -3.513206 |
| 92 | 1 | 0 | 0.460856  | -5.286472 | -2.631772 |
| 93 | 1 | 0 | -1.258531 | -5.315881 | -2.150674 |

-----

**Cation of Compound 2a (2a<sup>+</sup>), no imaginary frequencies, E(UB3LYP) = -2161.38062994 A.U.**

-----

| Center | Atomic | Atomic | Coordinates (Angstroms) |          |           |
|--------|--------|--------|-------------------------|----------|-----------|
| Number | Number | Type   | X                       | Y        | Z         |
| 1      | 6      | 0      | -7.294276               | 1.086328 | 1.426243  |
| 2      | 6      | 0      | -5.910990               | 0.930644 | 1.364081  |
| 3      | 6      | 0      | -5.248675               | 0.796798 | 0.136207  |
| 4      | 6      | 0      | -5.990999               | 0.808292 | -1.066916 |
| 5      | 6      | 0      | -7.387867               | 0.962333 | -0.991599 |
| 6      | 6      | 0      | -8.027480               | 1.102007 | 0.235404  |
| 7      | 6      | 0      | -3.761698               | 0.649671 | 0.120293  |

|    |   |   |           |           |           |
|----|---|---|-----------|-----------|-----------|
| 8  | 6 | 0 | -2.939511 | 1.800566  | -0.012480 |
| 9  | 7 | 0 | -1.567159 | 1.701886  | 0.050646  |
| 10 | 5 | 0 | -0.749309 | 0.377734  | 0.111273  |
| 11 | 7 | 0 | -1.787623 | -0.768300 | 0.309796  |
| 12 | 6 | 0 | -3.180174 | -0.609683 | 0.282615  |
| 13 | 6 | 0 | -3.296041 | 3.196647  | -0.179416 |
| 14 | 6 | 0 | -2.108887 | 3.889834  | -0.205712 |
| 15 | 6 | 0 | -1.031080 | 2.962091  | -0.054955 |
| 16 | 6 | 0 | -1.507484 | -2.076514 | 0.460361  |
| 17 | 6 | 0 | -2.723517 | -2.806918 | 0.542618  |
| 18 | 6 | 0 | -3.777219 | -1.924043 | 0.433058  |
| 19 | 6 | 0 | 0.357677  | 3.208293  | 0.016217  |
| 20 | 6 | 0 | 0.917173  | 4.464975  | -0.134694 |
| 21 | 6 | 0 | 2.297135  | 4.787138  | -0.062734 |
| 22 | 6 | 0 | -0.089184 | -2.596745 | 0.552162  |
| 23 | 6 | 0 | 0.088283  | -3.903495 | -0.265017 |
| 24 | 6 | 0 | 1.514150  | -4.408295 | -0.232990 |
| 25 | 6 | 0 | 2.701527  | 6.143142  | -0.240825 |
| 26 | 6 | 0 | 4.016053  | 6.527724  | -0.176655 |
| 27 | 6 | 0 | 5.044973  | 5.564307  | 0.074222  |
| 28 | 6 | 0 | 4.647448  | 4.197439  | 0.249609  |

|    |   |   |           |           |           |
|----|---|---|-----------|-----------|-----------|
| 29 | 6 | 0 | 3.329203  | 3.831520  | 0.182817  |
| 30 | 6 | 0 | 1.858746  | -5.597094 | 0.418819  |
| 31 | 6 | 0 | 3.171130  | -6.057918 | 0.462281  |
| 32 | 6 | 0 | 4.217045  | -5.333209 | -0.158747 |
| 33 | 6 | 0 | 3.859802  | -4.143064 | -0.842585 |
| 34 | 6 | 0 | 2.543971  | -3.699067 | -0.868405 |
| 35 | 7 | 0 | 6.344609  | 5.928066  | 0.143134  |
| 36 | 6 | 0 | 7.390593  | 4.931653  | 0.396906  |
| 37 | 6 | 0 | 6.739475  | 7.328971  | -0.036136 |
| 38 | 7 | 0 | 5.529404  | -5.764755 | -0.100696 |
| 39 | 6 | 0 | 6.544118  | -5.099325 | -0.904393 |
| 40 | 6 | 0 | 5.833574  | -7.071829 | 0.462264  |
| 41 | 6 | 0 | -4.653408 | 3.815618  | -0.316443 |
| 42 | 6 | 0 | -5.224040 | -2.308277 | 0.458803  |
| 43 | 9 | 0 | -0.056257 | 0.189970  | -1.083334 |
| 44 | 9 | 0 | 0.141160  | 0.418033  | 1.180417  |
| 45 | 7 | 0 | -5.355899 | 0.740284  | -2.305935 |
| 46 | 1 | 0 | -7.790430 | 1.193822  | 2.385605  |
| 47 | 1 | 0 | -5.323029 | 0.915891  | 2.278058  |
| 48 | 1 | 0 | -7.965611 | 0.973770  | -1.912571 |
| 49 | 1 | 0 | -9.107412 | 1.219124  | 0.261341  |



|    |   |   |           |           |           |
|----|---|---|-----------|-----------|-----------|
| 50 | 1 | 0 | -2.005967 | 4.961509  | -0.306417 |
| 51 | 1 | 0 | 0.994116  | 2.354856  | 0.215856  |
| 52 | 1 | 0 | 0.250826  | 5.302669  | -0.328220 |
| 53 | 1 | 0 | 0.573216  | -1.855828 | 0.103066  |
| 54 | 1 | 0 | 1.939647  | 6.893109  | -0.433424 |
| 55 | 1 | 0 | 4.267979  | 7.570390  | -0.318619 |
| 56 | 1 | 0 | 5.393124  | 3.436578  | 0.439213  |
| 57 | 1 | 0 | 3.076681  | 2.786010  | 0.321838  |
| 58 | 1 | 0 | 1.083776  | -6.190015 | 0.900934  |
| 59 | 1 | 0 | 3.378189  | -6.990015 | 0.973879  |
| 60 | 1 | 0 | 4.614231  | -3.562859 | -1.360201 |
| 61 | 1 | 0 | 2.308604  | -2.788092 | -1.413257 |
| 62 | 1 | 0 | 7.405562  | 4.171684  | -0.391090 |
| 63 | 1 | 0 | 8.357470  | 5.430893  | 0.413646  |
| 64 | 1 | 0 | 7.235424  | 4.440932  | 1.363212  |
| 65 | 1 | 0 | 6.459551  | 7.689098  | -1.031686 |
| 66 | 1 | 0 | 6.268629  | 7.966231  | 0.719405  |
| 67 | 1 | 0 | 7.819654  | 7.408404  | 0.069774  |
| 68 | 1 | 0 | 6.628406  | -4.039300 | -0.636653 |
| 69 | 1 | 0 | 7.511338  | -5.566666 | -0.714425 |
| 70 | 1 | 0 | 6.336951  | -5.162615 | -1.983599 |

|    |   |   |           |           |           |
|----|---|---|-----------|-----------|-----------|
| 71 | 1 | 0 | 5.366477  | -7.894320 | -0.101004 |
| 72 | 1 | 0 | 6.914144  | -7.221129 | 0.452554  |
| 73 | 1 | 0 | 5.497533  | -7.140193 | 1.503702  |
| 74 | 1 | 0 | -5.292778 | 3.599756  | 0.544824  |
| 75 | 1 | 0 | -4.553238 | 4.900815  | -0.408939 |
| 76 | 1 | 0 | -5.171117 | 3.442439  | -1.205948 |
| 77 | 1 | 0 | -5.314193 | -3.395871 | 0.529085  |
| 78 | 1 | 0 | -5.748855 | -1.863101 | 1.310203  |
| 79 | 1 | 0 | -5.749101 | -1.976998 | -0.442921 |
| 80 | 1 | 0 | -5.956112 | 0.468805  | -3.075991 |
| 81 | 1 | 0 | -4.479417 | 0.232397  | -2.328142 |
| 82 | 1 | 0 | -2.805504 | -3.879248 | 0.655055  |
| 83 | 1 | 0 | -0.574465 | -4.688097 | 0.132122  |
| 84 | 8 | 0 | 0.362750  | -2.697615 | 1.898122  |
| 85 | 8 | 0 | -0.347188 | -3.539846 | -1.575560 |
| 86 | 6 | 0 | -0.333415 | -3.582413 | 2.771169  |
| 87 | 1 | 0 | -0.292906 | -4.625003 | 2.432424  |
| 88 | 1 | 0 | 0.178584  | -3.509517 | 3.733337  |
| 89 | 1 | 0 | -1.382557 | -3.291014 | 2.906743  |
| 90 | 6 | 0 | -0.551740 | -4.645512 | -2.444028 |
| 91 | 1 | 0 | -0.899902 | -4.237050 | -3.395773 |

|    |   |   |           |           |           |
|----|---|---|-----------|-----------|-----------|
| 92 | 1 | 0 | 0.375340  | -5.208820 | -2.610100 |
| 93 | 1 | 0 | -1.314627 | -5.330248 | -2.044607 |

-----

**Compound CuCl<sub>2</sub>**, no imaginary frequencies, E(UB3LYP) = -2560.73931250 A.U.

-----

| Center<br>Number | Atomic<br>Number | Atomic<br>Type | Coordinates (Angstroms) |          |           |
|------------------|------------------|----------------|-------------------------|----------|-----------|
|                  |                  |                | X                       | Y        | Z         |
| 1                | 29               | 0              | -4.590832               | 2.443035 | -5.145324 |
| 2                | 17               | 0              | -4.007866               | 4.426708 | -5.423401 |
| 3                | 17               | 0              | -5.174027               | 0.459195 | -4.868924 |

-----

**Anion of Compound CuCl<sub>2</sub> [CuCl<sub>2</sub>]<sup>-</sup>**, no imaginary frequencies, E(UB3LYP) = -2560.90842624 A.U.

-----

| Center<br>Number | Atomic<br>Number | Atomic<br>Type | Coordinates (Angstroms) |          |           |
|------------------|------------------|----------------|-------------------------|----------|-----------|
|                  |                  |                | X                       | Y        | Z         |
| 1                | 29               | 0              | -4.590858               | 2.443019 | -5.145524 |
| 2                | 17               | 0              | -4.001077               | 4.449767 | -5.426513 |

3 17 0 -5.180790 0.436152 -4.865613

---

**Compound CuBr<sub>2</sub>**, no imaginary frequencies, E(UB3LYP) = -6783.76650207 A.U.

---

| Center<br>Number | Atomic<br>Number | Atomic<br>Type | Coordinates (Angstroms) |   |   |
|------------------|------------------|----------------|-------------------------|---|---|
|                  |                  |                | X                       | Y | Z |

---

|   |    |   |          |          |          |
|---|----|---|----------|----------|----------|
| 1 | 29 | 0 | 0.000000 | 0.202909 | 0.000000 |
|---|----|---|----------|----------|----------|

|   |    |   |          |           |          |
|---|----|---|----------|-----------|----------|
| 2 | 35 | 0 | 2.219468 | -0.084133 | 0.000000 |
|---|----|---|----------|-----------|----------|

|   |    |   |           |           |          |
|---|----|---|-----------|-----------|----------|
| 3 | 35 | 0 | -2.219468 | -0.083992 | 0.000000 |
|---|----|---|-----------|-----------|----------|

---

**Anion of Compound CuBr<sub>2</sub> [CuBr<sub>2</sub>]<sup>-</sup>**, no imaginary frequencies, E(UB3LYP) = -6783.96244993 A.U.

---

| Center<br>Number | Atomic<br>Number | Atomic<br>Type | Coordinates (Angstroms) |   |   |
|------------------|------------------|----------------|-------------------------|---|---|
|                  |                  |                | X                       | Y | Z |

---

|   |    |   |          |          |          |
|---|----|---|----------|----------|----------|
| 1 | 29 | 0 | 0.000056 | 0.000163 | 0.000020 |
|---|----|---|----------|----------|----------|

|   |    |   |          |           |          |
|---|----|---|----------|-----------|----------|
| 2 | 35 | 0 | 2.182587 | -0.019610 | 0.221515 |
|---|----|---|----------|-----------|----------|

3 35 0 -2.182634 0.019474 -0.221531

-----  
**Compound 2a·CuCl**, no imaginary frequencies, E(UB3LYP) = -2819.16575721  
A.U.

-----  
Center Atomic Atomic Coordinates (Angstroms)  
Number Number Type X Y Z

-----  
1 6 0 7.520701 1.174073 -1.567122  
2 6 0 6.139241 1.041337 -1.427438  
3 6 0 5.540240 0.922512 -0.166494  
4 6 0 6.349114 0.934633 0.993124  
5 6 0 7.742184 1.068025 0.842845  
6 6 0 8.318138 1.186643 -0.418441  
7 6 0 4.055061 0.773878 -0.069694  
8 6 0 3.241953 1.898933 0.022734  
9 7 0 1.844911 1.783851 0.056233  
10 5 0 1.083603 0.462019 -0.175355  
11 7 0 2.098466 -0.692465 -0.018649  
12 6 0 3.482883 -0.531636 -0.075235  
13 6 0 3.568017 3.306417 0.126618

|    |   |   |           |           |           |
|----|---|---|-----------|-----------|-----------|
| 14 | 6 | 0 | 2.370775  | 3.977247  | 0.209452  |
| 15 | 6 | 0 | 1.301258  | 3.029448  | 0.155364  |
| 16 | 6 | 0 | 1.822373  | -2.029639 | 0.017568  |
| 17 | 6 | 0 | 3.026268  | -2.739608 | -0.015077 |
| 18 | 6 | 0 | 4.082891  | -1.822879 | -0.074670 |
| 19 | 6 | 0 | -0.108172 | 3.272171  | 0.188083  |
| 20 | 6 | 0 | -0.648538 | 4.525103  | 0.261790  |
| 21 | 6 | 0 | -2.047240 | 4.875553  | 0.287552  |
| 22 | 6 | 0 | 0.415653  | -2.553286 | 0.089221  |
| 23 | 6 | 0 | 0.306988  | -4.036193 | 0.519038  |
| 24 | 6 | 0 | -1.124246 | -4.534857 | 0.487733  |
| 25 | 6 | 0 | -2.418165 | 6.231540  | 0.437078  |
| 26 | 6 | 0 | -3.740268 | 6.637254  | 0.475471  |
| 27 | 6 | 0 | -4.793889 | 5.690580  | 0.360753  |
| 28 | 6 | 0 | -4.425913 | 4.324279  | 0.199587  |
| 29 | 6 | 0 | -3.100553 | 3.937025  | 0.165554  |
| 30 | 6 | 0 | -1.549319 | -5.482214 | -0.448579 |
| 31 | 6 | 0 | -2.870078 | -5.921743 | -0.501781 |
| 32 | 6 | 0 | -3.836604 | -5.434402 | 0.410459  |
| 33 | 6 | 0 | -3.400790 | -4.474657 | 1.359011  |
| 34 | 6 | 0 | -2.078322 | -4.046679 | 1.391899  |

|    |   |   |           |           |           |
|----|---|---|-----------|-----------|-----------|
| 35 | 7 | 0 | -6.108788 | 6.074310  | 0.399102  |
| 36 | 6 | 0 | -7.169534 | 5.083855  | 0.258248  |
| 37 | 6 | 0 | -6.457716 | 7.482300  | 0.538706  |
| 38 | 7 | 0 | -5.146238 | -5.889340 | 0.392490  |
| 39 | 6 | 0 | -6.153539 | -5.187494 | 1.176212  |
| 40 | 6 | 0 | -5.601343 | -6.697298 | -0.729891 |
| 41 | 6 | 0 | 4.918132  | 3.955653  | 0.175055  |
| 42 | 6 | 0 | 5.534129  | -2.209741 | -0.100348 |
| 43 | 9 | 0 | 0.032146  | 0.312856  | 0.748464  |
| 44 | 9 | 0 | 0.526535  | 0.451297  | -1.479053 |
| 45 | 7 | 0 | 5.782456  | 0.887015  | 2.267563  |
| 46 | 1 | 0 | 7.965588  | 1.265450  | -2.553244 |
| 47 | 1 | 0 | 5.502342  | 1.026333  | -2.308153 |
| 48 | 1 | 0 | 8.368426  | 1.080745  | 1.731895  |
| 49 | 1 | 0 | 9.397025  | 1.286568  | -0.503410 |
| 50 | 1 | 0 | 2.253860  | 5.047698  | 0.308940  |
| 51 | 1 | 0 | -0.754146 | 2.402886  | 0.160310  |
| 52 | 1 | 0 | 0.031707  | 5.374273  | 0.312541  |
| 53 | 1 | 0 | -0.148932 | -1.961961 | 0.809618  |
| 54 | 1 | 0 | -1.637303 | 6.983488  | 0.527448  |
| 55 | 1 | 0 | -3.961548 | 7.690948  | 0.593035  |

|    |   |   |           |           |           |
|----|---|---|-----------|-----------|-----------|
| 56 | 1 | 0 | -5.189812 | 3.563978  | 0.092606  |
| 57 | 1 | 0 | -2.880267 | 2.882971  | 0.022617  |
| 58 | 1 | 0 | -0.835929 | -5.889418 | -1.162796 |
| 59 | 1 | 0 | -3.143795 | -6.652023 | -1.253557 |
| 60 | 1 | 0 | -4.096904 | -4.060932 | 2.078525  |
| 61 | 1 | 0 | -1.781998 | -3.320772 | 2.145240  |
| 62 | 1 | 0 | -7.121445 | 4.327292  | 1.051724  |
| 63 | 1 | 0 | -8.135536 | 5.584470  | 0.326388  |
| 64 | 1 | 0 | -7.118685 | 4.568817  | -0.710095 |
| 65 | 1 | 0 | -6.064085 | 7.903926  | 1.472668  |
| 66 | 1 | 0 | -6.071393 | 8.081015  | -0.296949 |
| 67 | 1 | 0 | -7.543179 | 7.581431  | 0.554150  |
| 68 | 1 | 0 | -6.265917 | -4.133200 | 0.878068  |
| 69 | 1 | 0 | -7.115607 | -5.685718 | 1.045658  |
| 70 | 1 | 0 | -5.909948 | -5.214494 | 2.244346  |
| 71 | 1 | 0 | -5.019073 | -7.622436 | -0.808808 |
| 72 | 1 | 0 | -6.643398 | -6.977390 | -0.566987 |
| 73 | 1 | 0 | -5.531520 | -6.166897 | -1.692840 |
| 74 | 1 | 0 | 5.511417  | 3.735909  | -0.718153 |
| 75 | 1 | 0 | 4.803589  | 5.040923  | 0.254932  |
| 76 | 1 | 0 | 5.497022  | 3.607835  | 1.037251  |



|    |    |   |           |           |           |
|----|----|---|-----------|-----------|-----------|
| 77 | 1  | 0 | 5.622674  | -3.299832 | -0.146447 |
| 78 | 1  | 0 | 6.061718  | -1.788132 | -0.961717 |
| 79 | 1  | 0 | 6.066856  | -1.870164 | 0.795119  |
| 80 | 1  | 0 | 6.406642  | 0.564753  | 2.997821  |
| 81 | 1  | 0 | 4.878473  | 0.432932  | 2.327000  |
| 82 | 1  | 0 | 3.129672  | -3.815057 | 0.029767  |
| 83 | 1  | 0 | 0.914321  | -4.664440 | -0.151925 |
| 84 | 8  | 0 | -0.312839 | -2.348359 | -1.165575 |
| 85 | 8  | 0 | 0.870912  | -4.055703 | 1.827933  |
| 86 | 6  | 0 | 0.373853  | -2.713383 | -2.381833 |
| 87 | 1  | 0 | 0.809195  | -3.711261 | -2.288134 |
| 88 | 1  | 0 | -0.384495 | -2.719451 | -3.165266 |
| 89 | 1  | 0 | 1.150856  | -1.981927 | -2.615904 |
| 90 | 6  | 0 | 1.125383  | -5.361695 | 2.323205  |
| 91 | 1  | 0 | 1.566832  | -5.240848 | 3.315333  |
| 92 | 1  | 0 | 0.204155  | -5.952683 | 2.406413  |
| 93 | 1  | 0 | 1.833894  | -5.901856 | 1.677145  |
| 94 | 29 | 0 | -1.688340 | -0.936141 | -1.275894 |
| 95 | 17 | 0 | -3.419524 | 0.314084  | -1.458221 |

-----

**Cation of Compound 2a·CuCl [2a·CuCl]<sup>+</sup>**, no imaginary frequencies, E(UB3LYP) = -  
2818.98957040 A.U.

---

| Center<br>Number | Atomic<br>Number | Atomic<br>Type | Coordinates (Angstroms) |           |           |
|------------------|------------------|----------------|-------------------------|-----------|-----------|
|                  |                  |                | X                       | Y         | Z         |
| 1                | 6                | 0              | 7.566909                | 0.752925  | -1.559431 |
| 2                | 6                | 0              | 6.183496                | 0.665107  | -1.417332 |
| 3                | 6                | 0              | 5.580018                | 0.685099  | -0.151655 |
| 4                | 6                | 0              | 6.383352                | 0.780377  | 1.008262  |
| 5                | 6                | 0              | 7.779889                | 0.861267  | 0.852159  |
| 6                | 6                | 0              | 8.360675                | 0.851224  | -0.411628 |
| 7                | 6                | 0              | 4.092219                | 0.595964  | -0.056463 |
| 8                | 6                | 0              | 3.313010                | 1.773260  | 0.060914  |
| 9                | 7                | 0              | 1.933225                | 1.712936  | 0.075621  |
| 10               | 5                | 0              | 1.103453                | 0.437148  | -0.206858 |
| 11               | 7                | 0              | 2.071074                | -0.767229 | -0.063730 |
| 12               | 6                | 0              | 3.465831                | -0.658361 | -0.100267 |
| 13               | 6                | 0              | 3.714011                | 3.161515  | 0.177531  |
| 14               | 6                | 0              | 2.548354                | 3.888676  | 0.253105  |
| 15               | 6                | 0              | 1.438972                | 2.991020  | 0.180594  |

|    |   |   |           |           |           |
|----|---|---|-----------|-----------|-----------|
| 16 | 6 | 0 | 1.747718  | -2.082029 | -0.035846 |
| 17 | 6 | 0 | 2.929811  | -2.853343 | -0.058050 |
| 18 | 6 | 0 | 4.015975  | -1.994743 | -0.099632 |
| 19 | 6 | 0 | 0.054812  | 3.278503  | 0.194814  |
| 20 | 6 | 0 | -0.454544 | 4.563478  | 0.281391  |
| 21 | 6 | 0 | -1.826851 | 4.920355  | 0.280293  |
| 22 | 6 | 0 | 0.315977  | -2.554075 | 0.033146  |
| 23 | 6 | 0 | 0.154987  | -4.043282 | 0.419967  |
| 24 | 6 | 0 | -1.299515 | -4.465032 | 0.432124  |
| 25 | 6 | 0 | -2.184176 | 6.294483  | 0.434748  |
| 26 | 6 | 0 | -3.489681 | 6.709600  | 0.451570  |
| 27 | 6 | 0 | -4.556156 | 5.761818  | 0.307025  |
| 28 | 6 | 0 | -4.203769 | 4.380463  | 0.138614  |
| 29 | 6 | 0 | -2.894556 | 3.981622  | 0.126430  |
| 30 | 6 | 0 | -1.813343 | -5.344070 | -0.526970 |
| 31 | 6 | 0 | -3.156338 | -5.710201 | -0.541364 |
| 32 | 6 | 0 | -4.056557 | -5.215973 | 0.434510  |
| 33 | 6 | 0 | -3.530133 | -4.325703 | 1.405713  |
| 34 | 6 | 0 | -2.186776 | -3.969066 | 1.398713  |
| 35 | 7 | 0 | -5.847040 | 6.154380  | 0.323828  |
| 36 | 6 | 0 | -6.933023 | 5.175342  | 0.189612  |

|    |   |   |           |           |           |
|----|---|---|-----------|-----------|-----------|
| 37 | 6 | 0 | -6.199253 | 7.571371  | 0.473262  |
| 38 | 7 | 0 | -5.385511 | -5.598258 | 0.452249  |
| 39 | 6 | 0 | -6.315853 | -4.917895 | 1.342284  |
| 40 | 6 | 0 | -5.929210 | -6.349885 | -0.670047 |
| 41 | 6 | 0 | 5.093067  | 3.742884  | 0.235561  |
| 42 | 6 | 0 | 5.448484  | -2.431472 | -0.101627 |
| 43 | 9 | 0 | 0.045900  | 0.317650  | 0.706009  |
| 44 | 9 | 0 | 0.580827  | 0.490294  | -1.510601 |
| 45 | 7 | 0 | 5.811708  | 0.861306  | 2.276847  |
| 46 | 1 | 0 | 8.017002  | 0.745138  | -2.547029 |
| 47 | 1 | 0 | 5.549734  | 0.586557  | -2.296688 |
| 48 | 1 | 0 | 8.404417  | 0.934636  | 1.739143  |
| 49 | 1 | 0 | 9.441669  | 0.915622  | -0.500175 |
| 50 | 1 | 0 | 2.480434  | 4.962760  | 0.355804  |
| 51 | 1 | 0 | -0.622783 | 2.435275  | 0.144544  |
| 52 | 1 | 0 | 0.246676  | 5.390727  | 0.363788  |
| 53 | 1 | 0 | -0.200311 | -1.964705 | 0.791129  |
| 54 | 1 | 0 | -1.392883 | 7.030020  | 0.547591  |
| 55 | 1 | 0 | -3.708182 | 7.761765  | 0.577855  |
| 56 | 1 | 0 | -4.976261 | 3.633980  | 0.008986  |
| 57 | 1 | 0 | -2.683995 | 2.927975  | -0.025196 |

|    |   |   |           |           |           |
|----|---|---|-----------|-----------|-----------|
| 58 | 1 | 0 | -1.153269 | -5.755749 | -1.288116 |
| 59 | 1 | 0 | -3.500665 | -6.390573 | -1.310607 |
| 60 | 1 | 0 | -4.172070 | -3.912485 | 2.174075  |
| 61 | 1 | 0 | -1.820060 | -3.297335 | 2.171167  |
| 62 | 1 | 0 | -6.877953 | 4.425150  | 0.984249  |
| 63 | 1 | 0 | -7.886601 | 5.693768  | 0.267233  |
| 64 | 1 | 0 | -6.886141 | 4.672670  | -0.781844 |
| 65 | 1 | 0 | -5.844196 | 7.961108  | 1.432797  |
| 66 | 1 | 0 | -5.766714 | 8.165804  | -0.337495 |
| 67 | 1 | 0 | -7.282135 | 7.671704  | 0.437003  |
| 68 | 1 | 0 | -6.394553 | -3.840629 | 1.128724  |
| 69 | 1 | 0 | -7.305523 | -5.362965 | 1.229685  |
| 70 | 1 | 0 | -6.016649 | -5.036065 | 2.390181  |
| 71 | 1 | 0 | -5.406100 | -7.305173 | -0.794917 |
| 72 | 1 | 0 | -6.979370 | -6.571734 | -0.474615 |
| 73 | 1 | 0 | -5.863419 | -5.797629 | -1.620328 |
| 74 | 1 | 0 | 5.695554  | 3.454630  | -0.631123 |
| 75 | 1 | 0 | 5.030311  | 4.834323  | 0.266163  |
| 76 | 1 | 0 | 5.625594  | 3.404083  | 1.130256  |
| 77 | 1 | 0 | 5.499986  | -3.522721 | -0.052381 |
| 78 | 1 | 0 | 5.975780  | -2.100551 | -1.001955 |

|    |    |   |           |           |           |
|----|----|---|-----------|-----------|-----------|
| 79 | 1  | 0 | 5.997815  | -2.023922 | 0.753647  |
| 80 | 1  | 0 | 6.441487  | 0.648747  | 3.041592  |
| 81 | 1  | 0 | 4.919478  | 0.396478  | 2.395327  |
| 82 | 1  | 0 | 2.977125  | -3.931675 | -0.015973 |
| 83 | 1  | 0 | 0.703394  | -4.678812 | -0.293403 |
| 84 | 8  | 0 | -0.407120 | -2.262660 | -1.194488 |
| 85 | 8  | 0 | 0.774117  | -4.118995 | 1.700572  |
| 86 | 6  | 0 | 0.230312  | -2.634177 | -2.439446 |
| 87 | 1  | 0 | 0.620360  | -3.652478 | -2.376668 |
| 88 | 1  | 0 | -0.548001 | -2.588569 | -3.200858 |
| 89 | 1  | 0 | 1.030770  | -1.930262 | -2.678699 |
| 90 | 6  | 0 | 0.976676  | -5.447725 | 2.165839  |
| 91 | 1  | 0 | 1.472445  | -5.366806 | 3.135669  |
| 92 | 1  | 0 | 0.026698  | -5.982716 | 2.286457  |
| 93 | 1  | 0 | 1.618980  | -6.016196 | 1.477229  |
| 94 | 29 | 0 | -1.790475 | -0.858137 | -1.214291 |
| 95 | 17 | 0 | -3.466530 | 0.469467  | -1.274417 |

-----  
**Compound 2a·CuBr**, no imaginary frequencies, E(UB3LYP) = -4930.38135066 A.U.  
 -----

| Center | Atomic | Atomic | Coordinates (Angstroms) |  |  |
|--------|--------|--------|-------------------------|--|--|
|--------|--------|--------|-------------------------|--|--|

| Number | Number | Type | X         | Y         | Z         |
|--------|--------|------|-----------|-----------|-----------|
| 1      | 6      | 0    | -7.721582 | -1.192402 | -1.629708 |
| 2      | 6      | 0    | -6.340281 | -1.066818 | -1.481712 |
| 3      | 6      | 0    | -5.750048 | -0.920323 | -0.220540 |
| 4      | 6      | 0    | -6.570201 | -0.898203 | 0.930307  |
| 5      | 6      | 0    | -7.962003 | -1.024189 | 0.773421  |
| 6      | 6      | 0    | -8.528548 | -1.169303 | -0.489137 |
| 7      | 6      | 0    | -4.265586 | -0.774631 | -0.108464 |
| 8      | 6      | 0    | -3.458764 | -1.899227 | 0.031328  |
| 9      | 7      | 0    | -2.064496 | -1.787648 | 0.076062  |
| 10     | 5      | 0    | -1.289220 | -0.471987 | -0.192395 |
| 11     | 7      | 0    | -2.310362 | 0.688798  | -0.048753 |
| 12     | 6      | 0    | -3.691532 | 0.530659  | -0.135314 |
| 13     | 6      | 0    | -3.791450 | -3.303525 | 0.174652  |
| 14     | 6      | 0    | -2.597398 | -3.973300 | 0.284333  |
| 15     | 6      | 0    | -1.524263 | -3.027736 | 0.209245  |
| 16     | 6      | 0    | -2.029671 | 2.022136  | -0.016763 |
| 17     | 6      | 0    | -3.230420 | 2.737089  | -0.088577 |
| 18     | 6      | 0    | -4.287963 | 1.824047  | -0.165227 |
| 19     | 6      | 0    | -0.115013 | -3.264229 | 0.242105  |

|    |   |   |           |           |           |
|----|---|---|-----------|-----------|-----------|
| 20 | 6 | 0 | 0.438016  | -4.508599 | 0.333518  |
| 21 | 6 | 0 | 1.845013  | -4.829795 | 0.336113  |
| 22 | 6 | 0 | -0.623218 | 2.538059  | 0.121311  |
| 23 | 6 | 0 | -0.527192 | 4.053726  | 0.423777  |
| 24 | 6 | 0 | 0.908410  | 4.537627  | 0.432095  |
| 25 | 6 | 0 | 2.256375  | -6.168200 | 0.514241  |
| 26 | 6 | 0 | 3.591682  | -6.534867 | 0.523304  |
| 27 | 6 | 0 | 4.609402  | -5.562344 | 0.347727  |
| 28 | 6 | 0 | 4.199775  | -4.216021 | 0.155667  |
| 29 | 6 | 0 | 2.864346  | -3.866041 | 0.152440  |
| 30 | 6 | 0 | 1.395896  | 5.401084  | -0.551612 |
| 31 | 6 | 0 | 2.728724  | 5.803611  | -0.580244 |
| 32 | 6 | 0 | 3.641721  | 5.359930  | 0.403251  |
| 33 | 6 | 0 | 3.140041  | 4.496194  | 1.406673  |
| 34 | 6 | 0 | 1.807872  | 4.103025  | 1.415120  |
| 35 | 7 | 0 | 5.942634  | -5.907432 | 0.358989  |
| 36 | 6 | 0 | 6.960221  | -4.896011 | 0.113437  |
| 37 | 6 | 0 | 6.334147  | -7.300680 | 0.487134  |
| 38 | 7 | 0 | 4.971584  | 5.766212  | 0.398489  |
| 39 | 6 | 0 | 5.923875  | 5.061426  | 1.244456  |
| 40 | 6 | 0 | 5.493929  | 6.441686  | -0.777964 |



|    |   |   |           |           |           |
|----|---|---|-----------|-----------|-----------|
| 41 | 6 | 0 | -5.145866 | -3.942846 | 0.240435  |
| 42 | 6 | 0 | -5.737294 | 2.214523  | -0.232135 |
| 43 | 9 | 0 | -0.250644 | -0.304831 | 0.736896  |
| 44 | 9 | 0 | -0.754476 | -0.493605 | -1.489046 |
| 45 | 7 | 0 | -6.009287 | -0.821404 | 2.205634  |
| 46 | 1 | 0 | -8.159247 | -1.305469 | -2.616862 |
| 47 | 1 | 0 | -5.694801 | -1.078277 | -2.356258 |
| 48 | 1 | 0 | -8.596113 | -1.013334 | 1.657448  |
| 49 | 1 | 0 | -9.607457 | -1.263469 | -0.580945 |
| 50 | 1 | 0 | -2.481551 | -5.040631 | 0.415634  |
| 51 | 1 | 0 | 0.524826  | -2.392138 | 0.187980  |
| 52 | 1 | 0 | -0.228875 | -5.367014 | 0.413386  |
| 53 | 1 | 0 | -0.133861 | 2.009695  | 0.940166  |
| 54 | 1 | 0 | 1.500518  | -6.939205 | 0.650523  |
| 55 | 1 | 0 | 3.847392  | -7.578318 | 0.663609  |
| 56 | 1 | 0 | 4.928556  | -3.430783 | -0.004029 |
| 57 | 1 | 0 | 2.621941  | -2.820995 | -0.015723 |
| 58 | 1 | 0 | 0.724503  | 5.766251  | -1.327217 |
| 59 | 1 | 0 | 3.054216  | 6.464158  | -1.374708 |
| 60 | 1 | 0 | 3.795113  | 4.116928  | 2.181166  |
| 61 | 1 | 0 | 1.460931  | 3.441502  | 2.204915  |

|    |   |   |           |           |           |
|----|---|---|-----------|-----------|-----------|
| 62 | 1 | 0 | 6.909738  | -4.088975 | 0.855187  |
| 63 | 1 | 0 | 7.946583  | -5.357372 | 0.184642  |
| 64 | 1 | 0 | 6.862620  | -4.445860 | -0.884434 |
| 65 | 1 | 0 | 5.970124  | -7.736278 | 1.427400  |
| 66 | 1 | 0 | 5.953002  | -7.915583 | -0.341450 |
| 67 | 1 | 0 | 7.423152  | -7.369123 | 0.486455  |
| 68 | 1 | 0 | 5.985629  | 3.986115  | 1.014061  |
| 69 | 1 | 0 | 6.913740  | 5.501840  | 1.107438  |
| 70 | 1 | 0 | 5.661345  | 5.169215  | 2.303096  |
| 71 | 1 | 0 | 4.954582  | 7.378023  | -0.962534 |
| 72 | 1 | 0 | 6.541756  | 6.696876  | -0.606260 |
| 73 | 1 | 0 | 5.432060  | 5.825786  | -1.690152 |
| 74 | 1 | 0 | -5.741341 | -3.743503 | -0.656154 |
| 75 | 1 | 0 | -5.038568 | -5.026990 | 0.347672  |
| 76 | 1 | 0 | -5.720808 | -3.570465 | 1.095323  |
| 77 | 1 | 0 | -5.821322 | 3.304183  | -0.301181 |
| 78 | 1 | 0 | -6.248587 | 1.779214  | -1.096580 |
| 79 | 1 | 0 | -6.295355 | 1.895448  | 0.655823  |
| 80 | 1 | 0 | -6.625770 | -0.472140 | 2.928362  |
| 81 | 1 | 0 | -5.087398 | -0.404637 | 2.253355  |
| 82 | 1 | 0 | -3.329874 | 3.812613  | -0.044615 |

|    |    |   |           |           |           |
|----|----|---|-----------|-----------|-----------|
| 83 | 1  | 0 | -1.086670 | 4.620907  | -0.339734 |
| 84 | 8  | 0 | 0.205198  | 2.215015  | -1.035213 |
| 85 | 8  | 0 | -1.171453 | 4.197620  | 1.686156  |
| 86 | 6  | 0 | -0.362313 | 2.460677  | -2.334295 |
| 87 | 1  | 0 | -0.804577 | 3.460714  | -2.375884 |
| 88 | 1  | 0 | 0.468020  | 2.401294  | -3.039239 |
| 89 | 1  | 0 | -1.108531 | 1.700298  | -2.573099 |
| 90 | 6  | 0 | -1.395440 | 5.542325  | 2.067351  |
| 91 | 1  | 0 | -1.899595 | 5.513403  | 3.036641  |
| 92 | 1  | 0 | -0.456387 | 6.103261  | 2.162682  |
| 93 | 1  | 0 | -2.042573 | 6.062945  | 1.342641  |
| 94 | 29 | 0 | 1.722694  | 0.934595  | -0.871918 |
| 95 | 35 | 0 | 3.639489  | -0.223128 | -0.793217 |

-----

**Cation of Compound 2a·CuBr [2a·CuBr]<sup>+</sup>**, no imaginary frequencies, E(UB3LYP) = -  
4930.20630267 A.U.

-----

| Center | Atomic | Atomic | Coordinates (Angstroms) |   |   |
|--------|--------|--------|-------------------------|---|---|
| Number | Number | Type   | X                       | Y | Z |

-----

|    |   |   |           |           |           |
|----|---|---|-----------|-----------|-----------|
| 1  | 6 | 0 | -7.679001 | -0.998168 | -1.606016 |
| 2  | 6 | 0 | -6.301091 | -0.864556 | -1.446596 |
| 3  | 6 | 0 | -5.715781 | -0.839993 | -0.172582 |
| 4  | 6 | 0 | -6.532308 | -0.936800 | 0.977820  |
| 5  | 6 | 0 | -7.923102 | -1.065697 | 0.804085  |
| 6  | 6 | 0 | -8.485713 | -1.098979 | -0.467519 |
| 7  | 6 | 0 | -4.232825 | -0.702915 | -0.058610 |
| 8  | 6 | 0 | -3.419159 | -1.854159 | 0.079181  |
| 9  | 7 | 0 | -2.041873 | -1.752354 | 0.106932  |
| 10 | 5 | 0 | -1.247128 | -0.451861 | -0.168839 |
| 11 | 7 | 0 | -2.255410 | 0.722428  | -0.045183 |
| 12 | 6 | 0 | -3.645344 | 0.569694  | -0.103574 |
| 13 | 6 | 0 | -3.780444 | -3.251889 | 0.210046  |
| 14 | 6 | 0 | -2.594926 | -3.942909 | 0.307994  |
| 15 | 6 | 0 | -1.511472 | -3.013969 | 0.233501  |
| 16 | 6 | 0 | -1.974554 | 2.046989  | -0.022283 |
| 17 | 6 | 0 | -3.179772 | 2.780600  | -0.071366 |
| 18 | 6 | 0 | -4.237373 | 1.887912  | -0.124011 |
| 19 | 6 | 0 | -0.120092 | -3.263549 | 0.260068  |
| 20 | 6 | 0 | 0.421508  | -4.533441 | 0.373604  |
| 21 | 6 | 0 | 1.801997  | -4.856688 | 0.379814  |

|    |   |   |           |           |           |
|----|---|---|-----------|-----------|-----------|
| 22 | 6 | 0 | -0.559775 | 2.563806  | 0.066726  |
| 23 | 6 | 0 | -0.450169 | 4.058009  | 0.451803  |
| 24 | 6 | 0 | 0.991182  | 4.521261  | 0.492246  |
| 25 | 6 | 0 | 2.194192  | -6.216838 | 0.569516  |
| 26 | 6 | 0 | 3.509941  | -6.597990 | 0.594516  |
| 27 | 6 | 0 | 4.552092  | -5.628167 | 0.420630  |
| 28 | 6 | 0 | 4.164195  | -4.261587 | 0.214903  |
| 29 | 6 | 0 | 2.845364  | -3.896595 | 0.197091  |
| 30 | 6 | 0 | 1.500603  | 5.407934  | -0.462199 |
| 31 | 6 | 0 | 2.832728  | 5.811757  | -0.450717 |
| 32 | 6 | 0 | 3.725195  | 5.350046  | 0.547937  |
| 33 | 6 | 0 | 3.203305  | 4.451786  | 1.514207  |
| 34 | 6 | 0 | 1.870990  | 4.057089  | 1.481159  |
| 35 | 7 | 0 | 5.852487  | -5.987573 | 0.444266  |
| 36 | 6 | 0 | 6.912579  | -4.985183 | 0.278670  |
| 37 | 6 | 0 | 6.240906  | -7.389896 | 0.636779  |
| 38 | 7 | 0 | 5.042106  | 5.770270  | 0.591369  |
| 39 | 6 | 0 | 5.972519  | 5.120161  | 1.503725  |
| 40 | 6 | 0 | 5.588169  | 6.529561  | -0.524622 |
| 41 | 6 | 0 | -5.142189 | -3.873574 | 0.260514  |
| 42 | 6 | 0 | -5.682773 | 2.278782  | -0.154404 |

|    |   |   |           |           |           |
|----|---|---|-----------|-----------|-----------|
| 43 | 9 | 0 | -0.208734 | -0.296911 | 0.759919  |
| 44 | 9 | 0 | -0.702854 | -0.491767 | -1.463624 |
| 45 | 7 | 0 | -5.977167 | -0.973174 | 2.255842  |
| 46 | 1 | 0 | -8.114843 | -1.023698 | -2.599693 |
| 47 | 1 | 0 | -5.657341 | -0.783188 | -2.318408 |
| 48 | 1 | 0 | -8.557610 | -1.141945 | 1.683745  |
| 49 | 1 | 0 | -9.562757 | -1.199478 | -0.569577 |
| 50 | 1 | 0 | -2.497116 | -5.013149 | 0.425547  |
| 51 | 1 | 0 | 0.535945  | -2.404199 | 0.196473  |
| 52 | 1 | 0 | -0.258972 | -5.375799 | 0.474311  |
| 53 | 1 | 0 | -0.036758 | 1.991617  | 0.833297  |
| 54 | 1 | 0 | 1.422216  | -6.969145 | 0.703353  |
| 55 | 1 | 0 | 3.755078  | -7.640480 | 0.748722  |
| 56 | 1 | 0 | 4.915555  | -3.498264 | 0.060389  |
| 57 | 1 | 0 | 2.610100  | -2.852941 | 0.015453  |
| 58 | 1 | 0 | 0.845802  | 5.795187  | -1.240505 |
| 59 | 1 | 0 | 3.174361  | 6.495981  | -1.217722 |
| 60 | 1 | 0 | 3.840007  | 4.062027  | 2.299013  |
| 61 | 1 | 0 | 1.506790  | 3.380347  | 2.250424  |
| 62 | 1 | 0 | 6.847183  | -4.220305 | 1.058534  |
| 63 | 1 | 0 | 7.879465  | -5.478376 | 0.356244  |

|    |   |   |           |           |           |
|----|---|---|-----------|-----------|-----------|
| 64 | 1 | 0 | 6.843110  | -4.504039 | -0.702210 |
| 65 | 1 | 0 | 5.900751  | -7.757417 | 1.610458  |
| 66 | 1 | 0 | 5.819231  | -8.020560 | -0.152051 |
| 67 | 1 | 0 | 7.325755  | -7.464430 | 0.597123  |
| 68 | 1 | 0 | 6.084520  | 4.044324  | 1.297980  |
| 69 | 1 | 0 | 6.951827  | 5.591379  | 1.408211  |
| 70 | 1 | 0 | 5.649337  | 5.235744  | 2.544759  |
| 71 | 1 | 0 | 5.039708  | 7.467756  | -0.668502 |
| 72 | 1 | 0 | 6.626586  | 6.784303  | -0.307673 |
| 73 | 1 | 0 | 5.560152  | 5.968753  | -1.471790 |
| 74 | 1 | 0 | -5.741450 | -3.618379 | -0.618668 |
| 75 | 1 | 0 | -5.046825 | -4.961948 | 0.310521  |
| 76 | 1 | 0 | -5.697029 | -3.536511 | 1.142178  |
| 77 | 1 | 0 | -5.769569 | 3.368610  | -0.127417 |
| 78 | 1 | 0 | -6.186572 | 1.913422  | -1.054807 |
| 79 | 1 | 0 | -6.230691 | 1.871090  | 0.701789  |
| 80 | 1 | 0 | -6.624028 | -0.761201 | 3.006376  |
| 81 | 1 | 0 | -5.100357 | -0.480262 | 2.376109  |
| 82 | 1 | 0 | -3.261770 | 3.857257  | -0.039811 |
| 83 | 1 | 0 | -1.001022 | 4.674574  | -0.276010 |
| 84 | 8 | 0 | 0.188700  | 2.292940  | -1.149800 |

|    |    |   |           |           |           |
|----|----|---|-----------|-----------|-----------|
| 85 | 8  | 0 | -1.097916 | 4.121010  | 1.718709  |
| 86 | 6  | 0 | -0.441824 | 2.641228  | -2.404433 |
| 87 | 1  | 0 | -0.855846 | 3.650842  | -2.354211 |
| 88 | 1  | 0 | 0.346403  | 2.607790  | -3.156226 |
| 89 | 1  | 0 | -1.222961 | 1.917515  | -2.648648 |
| 90 | 6  | 0 | -1.347628 | 5.445245  | 2.173821  |
| 91 | 1  | 0 | -1.862717 | 5.353997  | 3.132607  |
| 92 | 1  | 0 | -0.415792 | 6.006848  | 2.313485  |
| 93 | 1  | 0 | -1.989702 | 5.993323  | 1.468619  |
| 94 | 29 | 0 | 1.640040  | 0.951272  | -1.141837 |
| 95 | 35 | 0 | 3.480070  | -0.343290 | -1.171239 |

-----
